1 **Reduced function of the glutathione S-transferase S1 suppresses behavioral**  
2 **hyperexcitability in *Drosophila* expressing a mutant voltage-gated sodium channel**

3 Hung-Lin Chen<sup>\*,1</sup>, Junko Kasuya<sup>†</sup>, Patrick Lansdon<sup>\*,2</sup>, Garrett Kaas<sup>\*,3</sup>, Hanxi Tang<sup>‡</sup>, Maggie  
4 Sodders<sup>†</sup>, and Toshihiro Kitamoto<sup>\*,†</sup>

5 <sup>\*</sup>Interdisciplinary Graduate Program in Genetics, <sup>†</sup>Department of Anesthesia, Carver College  
6 of Medicine, <sup>‡</sup>Iowa Center for Research by Undergraduates, University of Iowa, IA 52242

7 <sup>1</sup>Current affiliation: Department of Medical Research, Tungs' Taichung MetroHarbor Hospital,  
8 Taichung City, Taiwan 43503, ROC

9 <sup>2</sup>Current affiliation: Department of Molecular Biosciences, College of Liberal Arts and  
10 Sciences, University of Kansas, KS 66045, USA

11 <sup>3</sup>Current affiliation: Department of Pharmacology, Vanderbilt University School of Medicine,  
12 Nashville, TN 37232, USA

13

14 **Running title**

15 Genetic suppression of fly seizures

16

17 **Key words**

18 Forward genetic screen, genetic modifiers, epilepsy, RNA-sequencing analysis

19

20 **Corresponding author**

21 Toshihiro Kitamoto, Ph.D.

22 Department of Anesthesia, Carver College of Medicine, University of Iowa, 1-316 BSB, 51

23 Newton Road, Iowa City, IA 52242

24 Tel 319-335-7924, Fax 319-356-2940, E-mail [toshi-kitamoto@uiowa.edu](mailto:toshi-kitamoto@uiowa.edu)

25

26 **Acknowledgements**

27 We thank Mr. Ryan Jewell and Mr. Pei-Jen Wang (Department of Medical Research, Tungs'

28 Taichung MetroHarbor Hospital, Taichung City, Taiwan 43503, ROC) for their technical

29 assistance.

30

31 **ABSTRACT**

32 Voltage-gated sodium (Na<sub>v</sub>) channels play a central role in the generation and  
33 propagation of action potentials in excitable cells such as neurons and muscles. To determine  
34 how the phenotypes of Na<sub>v</sub>-channel mutants are affected by other genes, we performed a  
35 forward genetic screen for dominant modifiers of the seizure-prone, gain-of-function *Drosophila*  
36 *melanogaster* Na<sub>v</sub>-channel mutant, *para*<sup>Shu</sup>. Our analyses using chromosome deficiencies,  
37 gene-specific RNA interference, and single-gene mutants revealed that a null allele of  
38 *glutathione S-transferase S1* (*GstS1*) dominantly suppresses *para*<sup>Shu</sup> phenotypes. Reduced  
39 *GstS1* function also suppressed phenotypes of other seizure-prone Na<sub>v</sub>-channel mutants,  
40 *para*<sup>GEFS+</sup> and *para*<sup>bss</sup>. Notably, *para*<sup>Shu</sup> mutants expressed 50% less *GstS1* than wild-type  
41 flies, further supporting the notion that *para*<sup>Shu</sup> and *GstS1* interact functionally. Introduction of a  
42 loss-of-function *GstS1* mutation into a *para*<sup>Shu</sup> background led to up- and down-regulation of  
43 various genes, with those encoding cytochrome P450 (CYP) enzymes most significantly over-  
44 represented in this group. Because *GstS1* is a fly ortholog of mammalian hematopoietic  
45 prostaglandin D synthase, and in mammals CYPs are involved in the oxygenation of  
46 polyunsaturated fatty acids including prostaglandins, our results raise the intriguing possibility  
47 that bioactive lipids play a role in *GstS1*-mediated suppression of *para*<sup>Shu</sup> phenotypes.

48

## 49 INTRODUCTION

50 Defects in ion-channel genes lead to a variety of human disorders that are collectively  
51 referred to as channelopathies. These include cardiac arrhythmias, myotonias, forms of  
52 diabetes and an array of neurological diseases such as epilepsy, familial hyperekplexia, and  
53 chronic pain syndromes (RAJAKULENDRAN *et al.* 2012; VENETUCCI *et al.* 2012; WAXMAN AND  
54 ZAMPONI 2014; DIB-HAJJ *et al.* 2015; JEN *et al.* 2016). The advent of genome-wide association  
55 studies and next-generation sequencing technology has made the identification of  
56 channelopathy mutations easier than ever before. However, the expressivity and disease  
57 severity are profoundly affected by interactions between the disease-causing genes and gene  
58 variants at other genetic loci. The significance of gene-gene interactions in channelopathies  
59 was demonstrated by Klassen *et al.* (2011), who performed extensive parallel exome  
60 sequencing of 237 human ion-channel genes and compared variation in the profiles between  
61 patients with the sporadic idiopathic epilepsy and unaffected individuals. The combined  
62 sequence data revealed that rare missense variants of known channelopathy genes were  
63 prevalent in both unaffected and disease groups at similar complexity. Thus, the effects of  
64 even deleterious ion-channel mutations could be compensated for by variant forms of other  
65 genes (KLASSEN *et al.* 2011).

66 *Drosophila* offers many advantages as an experimental system to elucidate the  
67 mechanisms by which genetic modifiers influence the severity of channelopathies because of  
68 the: wealth of available genomic information, advanced state of the available genetic tools,  
69 short life cycle, high fecundity, and evolutionary conservation of biological pathways (HALES *et al.*  
70 *et al.* 2015; UGUR *et al.* 2016). In the current study, we focused on genes that modify phenotypes  
71 of a voltage-gated sodium (Nav)-channel mutant in *Drosophila*. Nav-channels play a central  
72 role in the generation and propagation of action potentials in excitable cells such as neurons

73 and muscles (HODGKIN AND HUXLEY 1952; CATTERALL 2012). In mammals, the Nav-channel  
74 gene family comprises nine paralogs. These genes encode large (~260 kDa) pore-forming  
75 Nav-channel  $\alpha$ -subunits, Nav1.1- Nav1.9, all of which have distinct channel properties and  
76 unique patterns of expression involving both subsets of neurons and other cell types. The  
77 *Drosophila* genome contains a single Nav-channel gene, *paralytic* (*para*), on the X  
78 chromosome. It encodes Nav-channel protein isoforms that share high amino-acid sequence  
79 identity/similarity with mammalian counterparts (e.g., 45%/62% with the human Nav 1.1). High  
80 functional diversity of *para* Nav channels is achieved through extensive alternative splicing that  
81 produces a large number (~60) of unique transcripts (KROLL *et al.* 2015).

82 A number of *para* mutant alleles have been identified in *Drosophila*. They display a  
83 variety of physiological and behavioral phenotypes: lethality, olfactory defects, spontaneous  
84 tremors, neuronal hyperexcitability, resistance to insecticides, and paralysis or seizure in  
85 response to heat, cold, or mechanical shock (SUZUKI *et al.* 1971; GANETZKY AND WU 1982; LILLY  
86 *et al.* 1994; MARTIN *et al.* 2000; LINDSAY *et al.* 2008; PARKER *et al.* 2011; SUN *et al.* 2012;  
87 SCHUTTE *et al.* 2014; KAAS *et al.* 2016). One of these more recently characterized Nav-channel  
88 gene mutants, *para<sup>Shu</sup>*, is a dominant gain-of-function allele formerly referred to as *Shudderer*  
89 due to the “shuddering” or spontaneous tremors it causes (WILLIAMSON 1971; WILLIAMSON  
90 1982). This allele contains a missense mutation that results in the replacement of an  
91 evolutionarily conserved methionine residue in Nav-channel homology domain III (Kaas *et al.*  
92 2016). Adult *para<sup>Shu</sup>* mutants exhibit various dominant phenotypes in addition to shuddering,  
93 such as defective climbing behavior, increased susceptibility to electroconvulsive and heat-  
94 induced seizures, and short lifespan. They also have an abnormal down-turned wing posture  
95 and an indented thorax, both of which are thought to be caused by neuronal hyperexcitability  
96 (WILLIAMSON 1982; KAAS *et al.* 2016; KASUYA *et al.* 2019). In the current study, we carried out a

97 forward genetic screen for dominant modifiers of *para*<sup>Shu</sup> and found that the phenotypes are  
98 significantly suppressed by loss-of-function mutations in the *glutathione S-transferase S1*  
99 (*GstS1*) gene. To obtain insights into the mechanisms underlying this *GstS1*-mediated  
100 suppression of *para*<sup>Shu</sup> phenotypes, we also performed RNA-sequencing analysis. This  
101 revealed changes in gene expression that are caused by reduced *GstS1* function in the *para*<sup>Shu</sup>  
102 background.

103

## 104 MATERIALS AND METHODS

### 105 Fly stocks and culture conditions

106 Flies were reared at 25°C, 65% humidity in a 12 hr light/dark cycle on a  
107 cornmeal/glucose/yeast/agar medium supplemented with the mold inhibitor methyl 4-  
108 hydroxybenzoate (0.05 %). The exact composition of the fly food used in this study was  
109 described in Kasuya et al. (2019). The *Canton-S* (CS) strain was used as the wild-type control.  
110 *para*<sup>Shu</sup>, which was originally referred to as *Shudderer* (*Shu*) (WILLIAMSON 1982) and was  
111 obtained from Mr. Rodney Williamson (Beckman Research Institute of the Hope, CA).  
112 *Drosophila* lines carrying deficiencies of interest and a UAS-*GstS1* RNAi (GD16335) were  
113 obtained from the Bloomington Stock Center (Indiana University, IN) and the Vienna  
114 *Drosophila* Resource Center (Vienna, Austria), respectively. *GstS1*<sup>M26</sup> was obtained from Dr.  
115 Tina Tootle (University of Iowa, IA). Genetic epilepsy with febrile seizures plus (GEFS+) and  
116 Dravet syndrome (DS) flies (*para*<sup>GEFS+</sup> and *para*<sup>DS</sup>) (SUN et al. 2012; SCHUTTE et al. 2014) were  
117 obtained from Dr. Diane O'Dowd (University of California, Irvine, CA), and *bangsenseless*  
118 (*para*<sup>bss1</sup>) flies were obtained from Dr. Chun-Fang Wu (University of Iowa, IA).

## 119 Behavioral assays

120 Reactive climbing: The reactive climbing assay was performed as previously described  
121 (KAAS *et al.* 2016), using a countercurrent apparatus originally invented by Seymour Benzer  
122 (BENZER 1967). Five to seven-day-old females (~20) were placed into one tube (tube #0),  
123 tapped to the bottom, and allowed 15 sec to climb, at which point those that had climbed were  
124 transferred to the next tube. This process was repeated a total of 5 times. After the fifth trial,  
125 the flies in each tube (#0 ~ #5) were counted. The climbing index (CI) was calculated using the  
126 following formula:  $CI = \sum(N_i \times i) / (5 \times \sum N_i)$ , where  $i$  and  $N_i$  represent the tube number (0-5) and  
127 the number of flies in the corresponding tube, respectively. For each genotype, at least 3  
128 groups were tested.

129 Video-tracking locomotion analysis: Five-day-old flies were individually transferred into a  
130 plastic well (15 mm diameter x 3 mm depth) and their locomotion was recorded at 30 frames  
131 per second (fps) using a web camera at a resolution of 320 x 240 pixels for 10 minutes. The  
132 last 5 minutes of the movies were analyzed using pySolo, a multi-platform software for the  
133 analysis of sleep and locomotion in *Drosophila*, to compute the x and y coordinates of  
134 individual flies during every frame (GILESTRO AND CIRELLI 2009). When wild-type flies are  
135 placed in a circular chamber, they spend most of their time walking along the periphery  
136 (Besson and Martin 2005), resulting in circular tracking patterns. In contrast, the uncoordinated  
137 movements caused by spontaneous tremor or jerking of *para<sup>Shu</sup>* mutants lead to their  
138 increased presence in the center part of the chambers. The tremor frequency was therefore  
139 indirectly assessed by determining the percentage of time that fly stayed inside a circle whose  
140 radius is 74.3% of that of the entire chamber. The distance between the fly's position and the  
141 center of the chamber was calculated using the formula  $(X_i - X_c)^2 + (Y_i - Y_c)^2 < 13^2$  where  $X_i$  and  $Y_i$

142 are the coordinates of the fly, and  $X_c$  and  $Y_c$  are the coordinates of the chamber center (13 mm  
143 is 74.3 % of the chamber radius).

144 Heat-induced seizures: Newly eclosed flies were collected in groups of 20 and aged for  
145 3 to 5 days, after which the heat-induced seizure assay was performed as previously  
146 described (SUN *et al.* 2012). Briefly, a single fly was put into a 15 x 45 mm glass vial at room  
147 temperature (Thermo Fisher Scientific, MA) and allowed to acclimate for 2 to 10 minutes. The  
148 glass vial was then submerged in a water bath at the specified temperature for 2 minutes,  
149 during which the fly was video-taped and assessed for seizure behavior every 5 seconds.  
150 Seizure behavior was defined as loss of standing posture followed by leg shaking.

151 Bang-sensitive assay: The bang-sensitive assay was carried out following a previously  
152 described protocol (ZHANG *et al.* 2002). Briefly, 10 flies were raised on conventional food for 2-  
153 3 days post-eclosion. Prior to testing, individual flies were transferred to a clean vial and  
154 acclimated for 30 minutes. Next, the vials were vortexed at maximum speed for 10 seconds,  
155 and the time to recovery was measured. Recovery was defined as the ability of flies to stand  
156 upright following paralysis. At least 5 independent bang-sensitive assays were carried out for  
157 each genotype.

158 Male mating assay: Newly eclosed *para*<sup>Shu</sup> males with or without one or two copies of  
159 *GstS1*<sup>M26</sup> (i.e., *para*<sup>Shu</sup>/*Y* ; +/+, *para*<sup>Shu</sup>/*Y* ; *GstS1*<sup>M26</sup>/+, and *para*<sup>Shu</sup>/*Y* ; *GstS1*<sup>M26</sup>/*GstS1*<sup>M26</sup>)  
160 were collected. Each was placed, along with 3-5 day-old wild-type (*Canton-S*) virgin females,  
161 into a plastic tube (75 x 12 mm) containing approximately 1 ml of fly food. Tubes were kept at  
162 room temperature (~ 22°C) for two weeks, at which point they were examined for the presence  
163 of progeny.



## 164 **Gene expression analysis**

165 RNA was purified from one-day-old female flies using Trizol solution (Ambion, Carlsbad,  
166 CA) and an RNasy column (Qiagen, Valencia, CA). Flies of four genotypes were used: (1) +/+ ;  
167 +/+, (2) *para*<sup>Shu/+</sup> ; +/+, (3) +/+ ; *GstS1*<sup>M26/+</sup>, and (4) *para*<sup>Shu/+</sup> ; *GstS1*<sup>M26/+</sup>. For each  
168 genotype, RNA-sequence (RNA-seq) analysis was performed (four biological replicates) by the  
169 Iowa Institute of Human Genetics (IIHG) Genomics Division (University of Iowa, Iowa). DNase  
170 I-treated total RNA (500 ng) samples were enriched for PolyA-containing transcripts by  
171 treatment with oligo(dT) primer-coated beads. The enriched RNA pool was then fragmented,  
172 converted to cDNA, and ligated to index-containing sequence adaptors using the Illumina  
173 TruSeq Stranded mRNA Sample Preparation Kit (Cat. #RS-122-2101, Illumina, Inc., San  
174 Diego, CA). The molar concentrations of the indexed libraries were measured using the 2100  
175 Agilent Bioanalyzer (Agilent Technologies, Santa Clara, CA) and combined equally into pools  
176 for sequencing. The concentrations of the pools were measured using the Illumina Library  
177 Quantification Kit (KAPA Biosystems, Wilmington, MA) and the samples were sequenced on  
178 the Illumina HiSeq 4000 genome sequencer using 150 bp paired-end SBS chemistry.

179 Sequences in FASTQ format were analyzed using the Galaxy platform  
180 (<https://usegalaxy.org/>). The FASTQ files were first evaluated using a quality-control tool,  
181 FastQC. The sequenced reads were filtered for those that met two conditions: minimum length  
182 >20 and quality cutoff >20. After the quality control assessments were made, the reads were  
183 mapped to Release 6 of the *Drosophila melanogaster* reference genome assembly (dm6)  
184 using the STAR tool. The number of reads per annotated gene was determined by running the  
185 featureCounts tool. The differential gene expression analyses were performed using the  
186 DESeq2 tool (Love *et al.* 2014), which uses the median of ratios method to normalize counts.  
187 The *P*-value was adjusted ( $P_{adj}$ ) for multiple testing using the Benjamini-Hochberg procedure,

188 which controls for the false discovery rate (FDR). For functional enrichment analysis of  
189 differentially expressed genes (DEGs), we generated a list of those for which  $P_{adj} < 0.05$  and  
190 applied it to the Goseq tool for gene ontology analysis (YOUNG *et al.* 2010).

## 191 **Statistical analysis**

192 Statistical tests were performed using Sigma Plot (Systat Software, San Jose, CA). For  
193 multiple groups that exhibit non-normal distributions, the Kruskal-Wallis one-way ANOVA on  
194 ranks test was performed using Dunn's method *post hoc*. Data that did not conform to a normal  
195 distribution are presented as box-and-whisker plots (boxplots). Values of the first, second, and  
196 third quartiles (box) are shown, as are the 10<sup>th</sup> and 90<sup>th</sup> percentiles (whisker), unless otherwise  
197 stated. Two-way repeated measures ANOVA and Holm-Sidak multiple comparisons were used  
198 to analyze temperature-induced behavioral phenotypes. Fisher's exact test was used to  
199 analyze the wing and thorax phenotypes of *para<sup>Shu</sup>* mutants. For multiple comparison, the *P*-  
200 values were compared to the Bonferroni adjusted type I error rate for significance. Statistical  
201 analyses for RNAseq experiments are described in the previous section "Gene expression  
202 analysis by RNA-sequencing".

203

## 204 **RESULTS**

### 205 **The chromosomal region 53F4-53F8 contains a dominant modifier(s) of *para<sup>Shu</sup>***

206 To identify genes that interact with *para<sup>Shu</sup>* and influence the severity of the phenotype,  
207 we performed a forward genetic screen for dominant modifiers of *para<sup>Shu</sup>* using the  
208 Bloomington Deficiency Kit (COOK *et al.* 2012; ROOTE AND RUSSELL 2012). Females

209 heterozygous for *para<sup>Shu</sup>* (*para<sup>Shu</sup>/FM7*) were crossed to males carrying a deficiency on the  
210 second or third chromosome (+/Y ; *Df(2)/balancer* or +/Y ; *Df(3)/balancer*). The effects of the  
211 deficiency on *para<sup>Shu</sup>* were evaluated by examining the F1 female progeny trans-heterozygous  
212 for *para<sup>Shu</sup>* and the deficiency (e.g., *para<sup>Shu</sup>/+ ; Df/+*) for their reactive climbing behavior (see  
213 Materials and Methods). As reported previously, *para<sup>Shu</sup>* heterozygous females have a severe  
214 defect in climbing behavior due to spontaneous tremors and uncoordinated movements (KAAS  
215 *et al.* 2016). Our initial screen identified several chromosomal deficiencies that significantly  
216 improved the climbing behavior of *para<sup>Shu</sup>* females (Supplemental Table 1; deficiencies that  
217 resulted in CI>0.4 are shaded). The current study focuses on one of these deficiencies,  
218 *Df(2R)P803-Δ15*.

219 The *Df(2R)P803-Δ15* deficiency spans chromosomal region 53E-53F11 on the right arm  
220 of the second chromosome, but a lack of nucleotide level information regarding its break points  
221 made identifying the genomic region responsible for suppression of the *para<sup>Shu</sup>* phenotypes  
222 challenging. Therefore, we used three additional deficiencies which overlap *Df(2R)P803-Δ15*  
223 and also have molecularly defined break points (Figure 1A). Phenotypic analysis of *para<sup>Shu</sup>*  
224 females crossed to these deficiencies revealed that *Df(2R)Exel6065* and *Df(2R)BSC433*, but  
225 not *Df(2R)Exel6066*, had a robust suppressing effect similar to that of *Df(2R)P803-Δ15* (Figure  
226 1B). Of the two suppressing alleles, *Df(2R)BSC433* carries the smaller deficiency; it spans  
227 genomic region 53F4 to 53F8 (Figure 1A).

228 The suppressive effect of *Df(2R)BSC433* was confirmed by analyzing other *para<sup>Shu</sup>*  
229 phenotypes. The introduction of *Df(2R)BSC433* to the *para<sup>Shu</sup>* background (*para<sup>Shu</sup>/+ ;*  
230 *Df(2R)BSC433/+*) significantly reduced the severity of the abnormal wing posture, indented  
231 thorax (Figure 2A), spontaneous tremors (Figure 2B), and heat-induced seizures (Figure 2C).  
232 Two deficiency lines, *Df(2R)BSC273* (49F4-50A13) and *Df(2R)BSC330* (51D3-51F9), carry a

233 genetic background comparable to that of *Df(2R)BSC433*. Unlike *Df(2R)BSC433*, these  
234 deficiencies did not lead to suppression of *para<sup>Shu</sup>* phenotypes (Figure 2A-C), showing that the  
235 effect of *Df(2R)BSC433* is not due to its genetic background. Taken together, these results  
236 clearly demonstrate that removal of one copy of the genomic region 53F4-53F8 reduces the  
237 severity of multiple *para<sup>Shu</sup>* phenotypes, and that a dominant *para<sup>Shu</sup>* modifier is present in this  
238 chromosomal segment.

### 239 ***GstS1* loss of function suppresses *para<sup>Shu</sup>* phenotypes**

240 Based on the molecularly defined breakpoints of *Df(2R)BSC433* (2R:17,062,915 and  
241 2R:17,097,315), it disrupts six genes that are localized in the 53F4-53F8 region: *CG8950*,  
242 *CG6967*, *CG30460*, *CG8946* (*Sphingosine-1-phosphate lyase*; *Sply*), *CG6984*, and *CG8938*  
243 (*Glutathione S-transferase S1*; *GstS1*) (Figure 3A). To identify the gene(s) whose functional  
244 loss contributes to the marked suppression of *para<sup>Shu</sup>* phenotypes by *Df(2R)BSC433*, we  
245 knocked down each gene separately using gene-specific RNAi and examined the effects on  
246 *para<sup>Shu</sup>* phenotypes. Expression of each RNAi transgene of interest was driven by the  
247 ubiquitous Gal4 driver, *da-Gal4*. RNAi-mediated knockdown of *CG6967* or *Sply* resulted in  
248 developmental lethality, whereas knockdown of *CG8950*, *CG30460*, *CG6984* or *GstS1* did not.  
249 Among the viable adult progeny with gene-specific knockdown, those in which *GstS1* was  
250 knocked down showed the greatest improvement in wing and thorax phenotypes (Figure 3B).  
251 Thus, reduced *GstS1* function likely contributes to the suppression of *para<sup>Shu</sup>* phenotypes by  
252 *Df(2R)BSC433*.

253 *GstS1<sup>M26</sup>* is a null allele of *GstS1* in which the entire coding region is deleted  
254 (WHITWORTH *et al.* 2005) and homozygotes are viable as adults. We used *GstS1<sup>M26</sup>* to  
255 determine how reduced *GstS1* function affects *para<sup>Shu</sup>* phenotypes. In *para<sup>Shu</sup>/+ ; GstS1<sup>M26</sup>/+*

256 flies, both the morphological (downturned wing and indented thorax) and behavioral  
257 (spontaneous tremors and heat-induced seizure) phenotypes were considerably milder than in  
258 their *para<sup>Shu/+</sup>* counterparts (Figure 4A-C). *para<sup>Shu</sup>* phenotypes were not further improved in  
259 *GstS1<sup>M26</sup>* homozygotes (*para<sup>Shu/+</sup> ; GstS1<sup>M26/GstS1<sup>M26</sup></sup>*), where *GstS1* function was completely  
260 eliminated (Figure 4A-C). Thus, *GstS1<sup>M26</sup>* is a dominant suppressor of female *para<sup>Shu</sup>*  
261 phenotypes.

262 *GstS1<sup>M26</sup>* reduced the severity of the male *para<sup>Shu</sup>* phenotypes as well, including not  
263 only viability, but also courtship behavior and copulation. With respect to viability, *para<sup>Shu</sup>*  
264 males represented only 8.2% of the male progeny (*para<sup>Shu/Y</sup>* and *FM7/Y*) of a cross between  
265 *para<sup>Shu/FM7</sup>* females and wild-type males. Viability was significantly higher when one or two  
266 copies of *GstS1<sup>M26</sup>* were introduced into *para<sup>Shu</sup>* males (*para<sup>Shu/Y</sup> ; GstS1<sup>M26/+</sup>* and *para<sup>Shu/Y</sup> ;*  
267 *GstS1<sup>M26/GstS1<sup>M26</sup></sup>*), with *para<sup>Shu</sup>* males carrying *GstS1<sup>M26</sup>* representing 31.4% and 53.1% of  
268 the total male progeny, respectively (Table 1). The effects of *para<sup>Shu</sup>* on male courtship  
269 behavior/copulation are a consequence of the strong morphological (down-turned wings and  
270 indented thorax) and behavioral (spontaneous tremors and uncoordinated movements)  
271 phenotypes. When *para<sup>Shu</sup>* males were individually placed into small tubes with four wild-type  
272 virgin females and food, only one out of 43 (2.3%) produced progeny. The introduction of  
273 *GstS1<sup>M26</sup>* improved the ability to produce progeny; 17 out of 45 *para<sup>Shu</sup>* males (37.8%)  
274 heterozygous for *GstS1<sup>M26</sup>*, and 17 out of 44 *para<sup>Shu</sup>* males (38.6%) heterozygous for  
275 *GstS1<sup>M26</sup>*, produced progeny under the above-mentioned conditions (Table 1).

276 **Loss of function of other glutathione S-transferase genes does not suppress *para*<sup>Shu</sup>**  
277 **phenotypes as that of *GstS1***

278 The *Drosophila melanogaster* genome contains 36 genes that encode cytosolic  
279 glutathione S-transferases (GSTs). These are classified as Delta (D), Epsilon (E), Omega (O),  
280 Theta (T), Zeta (Z), or Sigma (S) based on similarities in the amino-acid sequences of the  
281 encoded proteins (TU AND AKGUL 2005; SAISAWANG *et al.* 2012). *GstS1* is the sole *Drosophila*  
282 member of the S class GST genes. To determine whether reductions in the copy number of  
283 other GST genes have significant impacts on *para*<sup>Shu</sup> phenotypes, we generated *para*<sup>Shu</sup>  
284 mutants carrying chromosome deficiencies that remove the D, E, O, T, or Z class of GST  
285 genes. Given that genes encoding GSTs of the same class tend to form gene clusters, a single  
286 chromosome deficiency often removes multiple GST genes of the same class. For example,  
287 *Df(3R)Exel6164* (87B5-87B10) removes eleven GST genes of the D class (*GstD1-D11*)  
288 (Table 2). For GST genes on the autosomes, *para*<sup>Shu</sup> females (*para*<sup>Shu</sup>/*FM7*) were crossed to  
289 males carrying a GST deficiency on the second or third chromosome. For the two GST genes  
290 on the X chromosome (*GstT3* and *GstT4*), females carrying the deficiency (*Df*/*FM7*) were  
291 crossed to *para*<sup>Shu</sup> males (*para*<sup>Shu</sup>/*Y*) because males carrying this (*Df*/*Y*) were not viable. The  
292 female progeny carrying both *para*<sup>Shu</sup> and a deficiency of interest were examined for their wing  
293 posture and thorax morphology. As shown in Table 2, as well as in Figure 2, removing one  
294 copy of *GstS1* in the context of *Df(2R)BSC433* resulted in significant suppression of both the  
295 down-turned wing and the indented thorax phenotypes of *para*<sup>Shu</sup>, but this ability was not  
296 shared by any of the 36 other cytosolic GST genes. In some cases, however, there was partial  
297 suppression of one or the other phenotype. For example, when one copy of *GstT4* was  
298 removed (using *Df(1)Exel6245*), the wing phenotype, but not the thorax phenotype, was  
299 suppressed. Similarly, the indented thorax phenotype, but not the down-turned wing

300 phenotype, was reduced when *GstD1-D11* was removed (using *Df(3R)Exel6164*) and when  
301 *GstT1-T2* was removed (using *Df(2R)BSC132*).

### 302 ***GstS1<sup>M26</sup>* suppresses the phenotypes of other *para* gain-of-function mutants**

303 We next examined whether phenotypes of other Na<sub>v</sub>-channel mutants are similarly  
304 affected by reduced *GstS1* function. Generalized epilepsy with febrile seizures plus (GEFS+)  
305 and Dravet syndrome (DS) are common childhood-onset genetic epileptic encephalopathies  
306 (CLAES *et al.* 2001; CATTERALL *et al.* 2010). Sun *et al.* (2012) and Schutte *et al.* (2014) created  
307 *Drosophila para* knock-in alleles, gain-of-function *para<sup>GEFS+</sup>* and loss-of-function *para<sup>DS</sup>*, by  
308 introducing a disease-causing human GEFS+ or DS mutation at the corresponding position of  
309 the fly Na<sub>v</sub>-channel gene. At 40°C, *para<sup>GEFS+</sup>* homozygous females and hemizygous males  
310 exhibit a temperature-induced seizure-like behavior that is similar to, but milder than, that  
311 observed in *para<sup>Shu</sup>* flies (SUN *et al.* 2012; KAAS *et al.* 2016; KASUYA *et al.* 2019). *para<sup>DS</sup>* flies  
312 lose their posture shortly after being transferred to 37°C (SCHUTTE *et al.* 2014). The  
313 temperature-induced phenotype of *para<sup>GEFS+</sup>* was significantly suppressed when a single copy  
314 of *GstS1<sup>M26</sup>* was introduced into *para<sup>GEFS+</sup>* males (*para<sup>GEFS+</sup>/Y ; GstS1<sup>M26</sup>/+*) (Figure 5A). In  
315 contrast, the severity of the phenotype in *para<sup>DS</sup>* males was unaffected by a copy of *GstS1<sup>M26</sup>*  
316 (*para<sup>GEFS+</sup>/Y ; GstS1<sup>M26</sup>/+*) (Figure 5B).

317 We also examined *para<sup>bss1</sup>*, which is a hyperexcitable, gain-of-function *para* mutant  
318 allele that displays semi-dominant, bang-sensitive paralysis (PARKER *et al.* 2011). The severity  
319 of the *para<sup>bss1</sup>* bang-sensitivity was evaluated as the time for recovery from paralysis that had  
320 been induced by mechanical stimulation (10 seconds of vortexing). All *para<sup>bss1</sup>* flies were  
321 paralyzed immediately after this mechanical stimulation. By three minutes after mechanical  
322 stimulation, 92% of the *para<sup>bss1</sup>* males carrying *GstS1<sup>M26</sup>* (*para<sup>bss1</sup>/Y ; GstS1<sup>M26</sup>/+*) had

323 recovered from paralysis and were able to right themselves, whereas only 12.6% of *para*<sup>bss1</sup>  
324 males had recovered. The median recovery time for *para*<sup>bss1</sup> males carrying *GstS1*<sup>M26</sup> was 88  
325 seconds and that for *para*<sup>bss1</sup> males was 160 seconds (Figure 5C).

326 **RNA sequencing analysis revealed changes in gene expression caused by *para*<sup>Shu</sup> and**  
327 ***GstS1*<sup>M26</sup> mutations.**

328 To gain insights into the molecular basis of the *GstS1*-dependent suppression of *para*<sup>Shu</sup>  
329 phenotypes, we performed RNA sequencing (RNA-seq) analysis and examined the  
330 transcriptome profiles of *para*<sup>Shu</sup> and wild-type females with or without *GstS1*<sup>M26</sup>. Whole-body  
331 transcriptomes of one-day-old females were compared among four genotypes: (1) +/+ ; +/+, (2)  
332 *para*<sup>Shu</sup>/+ ; +/+, (3) +/+ ; *GstS1*<sup>M26</sup>/+, and (4) *para*<sup>Shu</sup>/+ ; *GstS1*<sup>M26</sup>/+. Each sample generated at  
333 least 21 million sequencing reads, of which >99% met the criteria of having a quality score of  
334 >20 and a length of >20 bp. Moreover, duplicate reads encompassed ~70% of total reads,  
335 which was expected from the RNA-seq data (BANSAL 2017).

336 We found that 129 genes were differentially expressed (threshold: adjusted *P*-value  
337 (*P*<sub>adj</sub>)<0.05) between *para*<sup>Shu</sup> and wild-type females. Among these, 89 and 40 genes were up-  
338 and down-regulated, respectively, in *para*<sup>Shu</sup> vs. wild-type flies (Supplemental Table 2). Gene  
339 ontology analysis of the differentially expressed genes was performed using GOseq tools  
340 (YOUNG *et al.* 2010). Genes associated with four Gene Ontology categories were found to be  
341 overrepresented within the dataset (*P*<sub>adj</sub><0.05), each with a functional connection to the chitin-  
342 based cuticle: “structural constituent of chitin-based larval cuticle (GO:0008010)”, “structural  
343 constituent of chitin-based cuticle (GO:0005214)”, “structural constituent of cuticle  
344 (GO:0042302)”, and “chitin-based cuticle development (GO:0040003)” (Table 3A). Within



345 these GO categories, eight genes were differentially expressed between *para*<sup>Shu</sup> and wild-type  
346 flies (Table 3B).

347 Among the genes that are differentially regulated ( $P_{adj}<0.05$ ) between wild-type and  
348 *para*<sup>Shu</sup> flies (Supplemental Table 2), 16 displayed a fold change of >2 and all are up-regulated  
349 in *para*<sup>Shu</sup> flies (Table 4). They encode: a transferase (CG32581), two lysozymes (*LysC* and  
350 *LysD*), two endopeptidases (*Jon25Bi* and CG32523), one endonuclease (CG3819), two  
351 cytochrome P450 proteins (*Cyp4p1* and *Cyp6w1*), three ABC transporters (*I(2)03659*, CG7300  
352 and CG1494), three transcription factors (*lmd*, CG18446 and *Ada1-1*), and two cuticle proteins  
353 (*Cpr47Ef* and *Ccp84Ab*). Of note, *GstS1* was one of the 40 genes that are significantly down-  
354 regulated in *para*<sup>Shu</sup> females; the average normalized sequence counts (DESeq2) were 50%  
355 reduced (15562.21 vs 7782.01, adjusted  $P_{adj}=0.00036$ ) (Table 5, Figure 6). In general, we did  
356 not observe any significant differences in the expression of other GST genes between *para*<sup>Shu</sup>  
357 and wild-type flies, with the only exceptions being *GstD2* and *GstO2* (Table 5), down-regulated  
358 and up-regulated, respectively.

359 We next examined how *GstS1*<sup>M26</sup> affects gene expression profiles in *para*<sup>Shu</sup> mutants.  
360 The fact that *GstS1*<sup>M26</sup> is a deletion mutation that removes the entire coding region of *GstS1*  
361 (WHITWORTH *et al.* 2005) is consistent with our discovery that the levels of the *GstS1* transcript  
362 were 50% lower than those in wild-type flies when one copy of *GstS1*<sup>M26</sup> was introduced  
363 (Figure 6). Since *para*<sup>Shu</sup> and *GstS1*<sup>M26</sup> each reduced *GstS1* expression by ~50%, the level of  
364 *GstS1* expression in *para*<sup>Shu</sup>; *GstS1*<sup>M26</sup> double heterozygotes (*para*<sup>Shu/+</sup>; *GstS1*<sup>M26/+</sup>) was  
365 approximately one quarter of that in wild-type flies (Figure 6).

366 Comparison of *para*<sup>Shu</sup> flies to *para*<sup>Shu</sup> and *GstS1*<sup>M26</sup> double mutants (*para*<sup>Shu/+</sup>; +/+ vs.  
367 *para*<sup>Shu/+</sup>; *GstS1*<sup>M26/+</sup>) revealed the differential expression of 220 genes (for  $P_{adj}<0.05$ ;

368 Supplemental Table 2). Among these, 120 were up-regulated and 100 were downregulated in  
369 *para<sup>Shu</sup>* plus *GstS1<sup>M26</sup>* flies. Functional enrichment analysis of the differentially expressed  
370 genes revealed that genes associated with five specific molecular functions were over-  
371 represented. These include “heme binding” (GO:0020037), “tetrapyrrole binding”  
372 (GO:0046906), “iron ion binding” (GO:0005506), “oxidoreductase activity, acting on paired  
373 donors, with incorporation or reduction of molecular oxygen” (GO:0016705), and “cofactor  
374 binding” (GO:0048037) (Table 6A). Thirteen differentially regulated genes were associated  
375 with all five GO terms. These all encode heme-containing enzymes CYPs (Table 6B, marked  
376 with asterisks) that catalyze a diverse range of reactions and are critical for normal  
377 developmental processes and the detoxification of xenobiotic compounds (Hannemann et al.  
378 2007; Isin and Guengerich 2007; Chung et al. 2009).

379 Among the 220 genes differentially regulated in *para<sup>Shu</sup>* in the absence or presence of  
380 *GstS1<sup>M26</sup>* (*para<sup>Shu</sup>/+ ; +/+* vs. *para<sup>Shu</sup>/+ ; GstS1<sup>M26</sup>/+*), 25 were up-regulated and 12 were down-  
381 regulated (cutoff: fold change >2; Table 7). The gene for which the fold-change was greatest in  
382 *para<sup>Shu</sup>* plus *GstS1<sup>M26</sup>* flies was a member of the cytochrome P450 family, *Cyp4p2*; it was  
383 down-regulated 6.4-fold in the presence of *GstS1<sup>M26</sup>*, with  $P_{adj}=3.5 \times 10^{-48}$ . Notably, three of the  
384 top 20 genes with the greatest fold expression changes were members of this family (*Cyp4p2*,  
385 *Cyp6a8*, *Cyp6a2*).

386

## 387 DISCUSSION

388 In the present study, we performed an unbiased forward genetic screen to identify  
389 genes that have a significant impact on the phenotypes associated with *para<sup>Shu</sup>*, a gain-of-  
390 function variant of the *Drosophila* Nav channel gene. Our key finding was that a 50% reduction

391 of GstS1 function resulted in strong suppression of *para*<sup>Shu</sup> phenotypes. Glutathione S-  
392 transferases (GSTs) are phase II metabolic enzymes that are primarily involved in conjugation  
393 of the reduced form of glutathione to endogenous and xenobiotic electrophiles for  
394 detoxification (HAYES *et al.* 2005; ALLOCATI *et al.* 2018). Reduced GST function is generally  
395 considered damaging to organisms because it is expected to lead to an accumulation of  
396 harmful electrophilic compounds in the cell and thereby disturb critical cellular processes. In  
397 fact, a previous study showed that loss of *GstS1* function enhanced the loss of dopaminergic  
398 neurons in a *parkin* mutant, a *Drosophila* model of Parkinson's disease and conversely,  
399 overexpression of *GstS1* in the same dopaminergic neurons suppressed dopaminergic  
400 neurodegeneration in such mutants (WHITWORTH *et al.* 2005). Parkin has ubiquitin-protein  
401 ligase activity (IMAI *et al.* 2000; SHIMURA *et al.* 2000; ZHANG *et al.* 2000) and the accumulation  
402 of toxic Parkin substrates likely contributes to the degeneration of dopaminergic neurons in  
403 Parkinson's patients and animal models (WHITWORTH *et al.* 2005). These results are consistent  
404 with the idea that GstS1 plays a role in the detoxification of oxidatively damaged products to  
405 maintain healthy cellular environments. In this regard, it seems counterintuitive that loss of  
406 *GstS1* function reduces, rather than increases, the severity of *para*<sup>Shu</sup> phenotypes.

407 GstS1 is unique among *Drosophila* GSTs in several respects. A previous study, based  
408 on multiple alignments of GST sequences, had revealed that GstS1 is the sole member of the  
409 *Drosophila* sigma class of GST (AGIANIAN *et al.* 2003). Unlike other GSTs, GstS1 has low  
410 catalytic activity for typical GST substrates, such as 1-chloro-2,4-dinitrobenzol (CDNB), 1,2-  
411 dichloro-4-nitrobenzene (DCNB), and ethacrynic acid (EA). Instead, it efficiently catalyzes the  
412 conjugation of glutathione to 4-hydroxynonenal (4-HNE), an unsaturated carbonyl compound  
413 derived via lipid peroxidation (SINGH *et al.* 2001; AGIANIAN *et al.* 2003). The crystal structure of  
414 GstS1 indicates that its active-site topography is suitable for the binding of amphipolar lipid

415 peroxidation products such as 4-HNE (AGIANIAN *et al.* 2003), consistent with the above-  
416 mentioned substrate specificity. 4-HNE is the most abundant 4-hydroxyalkenal formed in cells  
417 and contributes to the deleterious effects of oxidative stress. It has been implicated in the  
418 pathogenesis and progression of human diseases such as cancer, Alzheimer's disease,  
419 diabetes, and cardiovascular disease (SHOEB *et al.* 2014; CSALA *et al.* 2015). However, 4-HNE  
420 also functions as a signaling molecule and has concentration-dependent effects on various  
421 cellular processes including differentiation, growth and apoptosis (ZHANG AND FORMAN 2017).  
422 GstS1 plays a major role in controlling the intracellular 4-HNE concentration to balance its  
423 beneficial and damaging effects; one study estimated that it is responsible for ~70% of the total  
424 capacity to conjugate 4-HNE with glutathione in adult *Drosophila* (SINGH *et al.* 2001). It is thus  
425 possible that in *para*<sup>Shu</sup> flies the reduction of GstS1 activity enhances the strength of 4-HNE-  
426 dependent signaling, leading to changes in neural development and/or function that  
427 compensate for the defect caused by the *para*<sup>Shu</sup> mutation.

428         Notably, GSTs are not limited to conjugating glutathione to potentially  
429 harmful substrates for their clearance, and it is possible that another such function accounts for  
430 our observations. Specifically, some GSTs catalyze the synthesis of physiologically important  
431 compounds. With respect to its primary amino acid sequence, *Drosophila* GstS1 is more  
432 similar to the vertebrate hematopoietic prostaglandin D2 synthases (HPGDSs) than to other  
433 *Drosophila* GSTs (AGIANIAN *et al.* 2003). Indeed, the sequence identity/similarity between  
434 *Drosophila* GstS1 and human HPGDS are 37%/59%, respectively. The *Drosophila* Integrative  
435 Ortholog Prediction Tool (DIOPT; <http://www.flyrnai.org/diopt>) (HU *et al.* 2011), as well as a  
436 recent and extensive bioinformatics analysis (SCARPATI *et al.* 2019), classified GstS1 as a fly  
437 ortholog of HPGDS, a sigma-class member of the GST family that catalyzes the isomerization  
438 of prostaglandin H<sub>2</sub> (PGH<sub>2</sub>) to prostaglandin D<sub>2</sub> (PGD<sub>2</sub>). Mammalian HPGDS is a critical

439 regulator of inflammation and the innate immune response (RAJAKARIAR *et al.* 2007; JOO AND  
440 SADIKOT 2012). In light of this observation, findings implicating GstS1 in the development and  
441 function of the innate immune system in insects are of interest. For example, in a lepidopteran  
442 *Spodoptera exigua*, the ortholog of *Drosophila* GstS1, SePGDS, was identified as PGD<sub>2</sub>  
443 synthase, with the addition of PGD<sub>2</sub>, but not its precursor (arachidonic acid), rescuing  
444 immunosuppression in larvae in response to SePGDS knockdown (SAJJADIAN *et al.* 2019).  
445 Consistent with this finding, previous studies in *Drosophila* had revealed that overexpression of  
446 GstS1 in hemocytes (the insect blood cells responsible for cellular immunity) leads to  
447 increases in the number of larval hemocytes (STOFANKO *et al.* 2008) and that GstS1 in  
448 hemocytes is increased ~10-fold at the onset of metamorphosis (REGAN *et al.* 2013). These  
449 results strongly support a significant role for GstS1 in the insect innate immune system. In  
450 addition, we previously found that genes involved in innate immune responses were up-  
451 regulated in the adult head of *para*<sup>Shu</sup> mutants (KAAS *et al.* 2016), suggesting that the neuronal  
452 hyperexcitability induced by gain-of-function *para*<sup>Shu</sup> Nav channels might lead to activation of  
453 the innate immune system. In light of these observations and our current findings it is possible  
454 that the reason that loss of GstS1 function reduces the severity of *para*<sup>Shu</sup> phenotypes is that it  
455 suppresses the innate immune response through hemocytes and prostaglandin-like bioactive  
456 lipids.

457 Another connection to the innate immune system is the discovery, based on our  
458 transcriptome analysis, that CYP genes are over-represented among the genes that are  
459 differentially expressed in the *para*<sup>Shu</sup> with a GstS1 mutation (Table 5). CYP enzymes are  
460 involved in the oxygenation of a wide range of compounds, including eicosanoids such as  
461 prostaglandins. In mammals, activation of the innate immune response alters CYP expression  
462 and eicosanoid metabolism in an isoform-, tissue-, and time-dependent manner (THEKEN *et al.*

463 2011). *GstS1* loss of function may affect *para<sup>Shu</sup>* phenotypes by changing the activities of CYP  
464 enzymes. Further studies are required to elucidate whether and how CYP genes, as well as  
465 the genes involved in innate immune response and bioactive lipid signaling, contribute to  
466 *GstS1*-mediated modulation of *para<sup>Shu</sup>* phenotypes.

467 To obtain insight into functional significance of changes in gene expression, we  
468 classified differentially expressed genes. For the 89 genes that were up-regulated by *para<sup>Shu</sup>*  
469 (*para<sup>Shu</sup>/+* vs. *+/+*), it is notable that 13 were down-regulated when *GstS1<sup>M26</sup>* was also  
470 introduced (*para<sup>Shu</sup>/+* vs. *para<sup>Shu</sup>/+ ; GstS1<sup>M26</sup>/+*) and that all of the GO categories associated  
471 ( $P_{adj}<0.05$ ) with this group of genes were related to the chitin-based cuticle (Table 3A). On the  
472 other hand, among the 40 genes down-regulated by *para<sup>Shu</sup>*, only 2 (*CG5966* and *CG5770*)  
473 were up-regulated by *GstS1<sup>M26</sup>*. Although *CG5770* is an uncharacterized gene, *CG5966*  
474 encodes proteins that are highly expressed in the larval and adult fat bodies and predicted to  
475 be involved in lipid catabolism. A human *CG5966* homolog encodes pancreatic lipase, which  
476 hydrolyzes triglycerides in the small intestine and is essential for the efficient digestion of  
477 dietary fat (DAVIS *et al.* 1991). Notably, changes in the expression of these cuticle-associated  
478 and fat metabolism-associated sets of genes appear to correlate with the phenotypic severity  
479 of *para<sup>Shu</sup>* in that a change in the phenotype or gene expression induced by *para<sup>Shu</sup>* is reversed  
480 by *GstS1<sup>M26</sup>*. It is possible that changes in the expression of these genes is causative and  
481 contributes to the severity of *para<sup>Shu</sup>* phenotypes. Alternatively, these changes in gene  
482 expression could be a consequence of phenotypic changes caused by other factors. Further  
483 functional analysis is required to determine the significance of these genes in controlling  
484 *para<sup>Shu</sup>* phenotypes.

485 In contrast to the expression of the above-mentioned genes, that of 24 genes was  
486 changed in the same direction by *para<sup>Shu</sup>* and *GstS1<sup>M26</sup>*. Among these, 17 were up-regulated

487 and 7 were down-regulated. No GO category was identified for any of the gene sets with  
488  $P_{adj} < 0.05$ . Interestingly, *GstS1* itself is one of the genes whose expression is down-regulated  
489 by both *para<sup>Shu</sup>* and *GstS1<sup>M26</sup>*. The observed reduction in levels of *GstS1* expression in the  
490 *GstS1<sup>M26</sup>* mutant is consistent with it being a deletion allele. However, its down-regulation in  
491 *para<sup>Shu</sup>* mutants was unexpected. One possible explanation for this finding is that homeostatic  
492 regulation at the level of gene expression counteracts the defects caused by hyperexcitability.  
493 It will be important to elucidate the mechanisms by which a gain-of-function mutation in a Nav-  
494 channel gene leads to down-regulation of the expression of its modifier gene and to reduction  
495 of the severity of the phenotype.

496 A previous genetic screen that was similar to ours revealed that loss of the function of  
497 *gilgamesh* (*gish*) reduces the severity of the seizure phenotypes of *para<sup>bss</sup>* mutant. *gish*  
498 encodes the *Drosophila* ortholog of casein kinase CK1 $\gamma$ 3, a member of the CK1 family of  
499 serine-threonine kinases (HOWLETT *et al.* 2013). Another modifier of seizure activity was  
500 discovered by Lin *et al.* (2017); this group identified *pumilio* (*pum*) based on transcriptome  
501 analyses of *Drosophila* seizure models, with *pum* significantly down-regulated in both the  
502 genetic (*para<sup>bss</sup>*) and pharmacological (picrotoxin-induced) models. It was shown that pan-  
503 neuronal overexpression of *pum* is sufficient to dramatically reduce seizure severity in *para<sup>bss</sup>*  
504 as well as other seizure-prone *Drosophila* mutants, *easily shocked* (*eas*) and *slamdance* (*sda*)  
505 (LIN *et al.* 2017). *pum* encodes RNA binding proteins that act as homeostatic regulators of  
506 action potential firing, partly by regulating the translation of *para* transcripts (LIN *et al.* 2017). In  
507 addition, we recently discovered that the seizure phenotypes of *para<sup>Shu</sup>* and other seizure-  
508 prone fly mutants are significantly suppressed when the flies are fed a diet supplemented with  
509 milk whey (KASUYA *et al.* 2019). It remains unclear how these genetic and environmental  
510 factors interact with one another in complex regulatory networks and how they modify the

511 neurological phenotypes of mutants. A mechanistic understanding of such functional  
512 interactions is expected to reveal the molecular and cellular processes that are critical for the  
513 manifestation of hyperexcitable phenotypes in *Drosophila* mutants, and to provide useful  
514 insights into the corresponding processes in vertebrate animals, including humans.

515

## 516 **FIGURE LEGENDS**

517 **Figure 1. Overlapping deficiencies in the 53E-53F chromosomal region and suppression**  
518 **of the climbing defect of *para*<sup>Shu</sup> mutants.**

519 (A) Chromosomal deficiencies in 53E-53F (right arm of second chromosome) that were  
520 examined for effects on *para*<sup>Shu</sup> phenotypes. The cytological location and chromosomal break  
521 points of each deficiency are indicated in the table. (B) Reactive climbing behaviors of *para*<sup>Shu</sup>  
522 heterozygous females in the presence of the tested deficiencies. Three to eight groups of ~20  
523 flies per genotype were tested. The total numbers of flies tested in each group were 141  
524 (control), 101 (*Df(2R)P803-Δ15*), 93 (*Df(2R)Exel6065*), 111 (*Df(2R)BSC433*), and 53  
525 (*Df(2R)Exel6066*). Climbing indices are presented as box plots. The Kruskal-Wallis one-way  
526 ANOVA on ranks with Dunn's method was used to compare between the control and  
527 deficiency groups. \*\*\* $P < 0.001$ ; NS, not significant ( $P > 0.05$ ).

528 **Figure 2. Suppression of multiple *para*<sup>Shu</sup> phenotypes by deletion of the genomic region**  
529 **53F4-53F8.**

530 The effects of chromosomal deficiencies *Df(2R)BSC273* (49F4-50A13), *Df(2R)BSC330*  
531 (51D3-51F9), and *Df(2R)BSC433* (53F4-53F8) on *para*<sup>Shu</sup> phenotypes were examined. (A)



532 Frequency of morphological defects, including down-turned wings and an indented thorax.  
533 Numbers in the bar graph indicate how many flies were scored. (B) Severity of spontaneous  
534 tremors. Numbers in the boxplot indicate how many flies were scored. (C) Severity of heat-  
535 induced seizures. Three groups of 30 flies were used per genotype. Data are shown as the  
536 averages and SEM. Fisher's exact test with Bonferroni correction (A), the Kruskal-Wallis one-  
537 way ANOVA on ranks with Dunn's method (B), and two-way repeated measures ANOVA and  
538 Holm-Sidak multiple comparisons (C) were used for comparisons between the control and  
539 deficiency groups. \*\*\* $P < 0.001$ ; \* $P < 0.05$ ; NS, not significant ( $P > 0.05$ ).

540 **Figure 3. Glutathione S-transferase S1 (*GstS1*) as a robust genetic modifier of *para<sup>Shu</sup>*.**

541 (A) Depiction of six genes that are localized within chromosomal region 53F4-53F8 and  
542 disrupted by the chromosomal deficiency *Df(2R)BSC433*. Arrows indicate the direction of gene  
543 transcription. (B) The frequency of *para<sup>Shu</sup>* morphological phenotypes following RNAi-mediated  
544 knockdown of each gene. Gene-specific RNAi was ubiquitously expressed using *da-GAI4* in  
545 *para<sup>Shu</sup>* heterozygous females (e.g., *para<sup>Shu</sup>/+* ; *da-GAI4/UAS-RNAi*). The downturned wing  
546 (Wing) and indented thorax (Thorax) phenotypes were scored. Numbers in the bar graph  
547 indicate how many flies were scored. Fisher's exact test with Bonferroni correction was used to  
548 analyze the data. \*\*\* $P < 0.001$ ; NS, not significant ( $P > 0.05$ ).

549 **Figure 4. *GstS1<sup>M26</sup>* as a dominant suppressor of *para<sup>Shu</sup>* phenotypes.**

550 The effects of the *GstS1* null allele, *GstS1<sup>M26</sup>*, on *para<sup>Shu</sup>* phenotypes were examined in  
551 flies of three genotypes: (1) *para<sup>Shu</sup>/+* ; *+/+*, (2) *para<sup>Shu</sup>/+* ; *GstS1<sup>M26</sup>/+*, and (3) *para<sup>Shu</sup>/+* ;  
552 *GstS1<sup>M26</sup>/GstS1<sup>M26</sup>*. (A) Frequencies of down-turned wings (Wings) and indented thorax  
553 (Thorax). Numbers in the bar graph indicate how many flies were scored. (B) Severity of

554 spontaneous tremors. 8–10-day-old *para*<sup>Shu/+</sup> females were used. Numbers in the boxplot  
555 indicate how many flies were scored. (C) Frequencies of heat-induced seizures. Three groups  
556 of 30-50 flies at 4-5 days after eclosion were used per genotype. Averages are shown with  
557 SEM. Fisher's exact test with Bonferroni correction (A), the Kruskal-Wallis one-way ANOVA on  
558 ranks with Dunn's method, (B) and two-way repeated measures ANOVA and Holm-Sidak  
559 multiple comparisons (C) were used to analyze the data. \*\*\**P*<0.001; \**P*<0.05; NS, not  
560 significant (*P*>0.05).

561 **Figure 5. Phenotypes of other neurological mutants are suppressed by *GstS1*<sup>M26</sup>.**

562 (A) Frequencies of heat-induced seizure at 40°C in *para*<sup>GEFS+</sup> plus *GstS1*<sup>M26</sup> males  
563 (*para*<sup>GEFS+/Y</sup> ; *GstS1*<sup>M26/+</sup>) or *para*<sup>GEFS+</sup> males (*para*<sup>GEFS+/Y</sup> ; +/+). (B) Frequencies of *para*<sup>DS</sup>  
564 males that did not stand at 37°C. For (A) and (B), averages of 3 experiments and SEM are  
565 shown. In each experiment, 30 flies were examined. (C) Recovery time required for *para*<sup>bss1</sup>  
566 plus *GstS1*<sup>M26</sup> males (*para*<sup>bss1/Y</sup> ; *GstS1*<sup>M26/+</sup>) and *para*<sup>bss1</sup> males (*para*<sup>bss1/Y</sup> ; +/+) to recover  
567 from paralysis induced by mechanical shock. Data are presented as box plots. Total numbers  
568 of flies observed were 127 and 223 flies for *para*<sup>bss1/Y</sup> ; +/+ and *para*<sup>bss1/Y</sup> ; *GstS1*<sup>M26/+</sup>,  
569 respectively. Data analysis involved two-way repeated measures ANOVA and Holm-Sidak  
570 multiple comparisons (A and B) and the Mann-Whitney *U* test (C). \*\*\**P*<0.001; \**P*<0.05; NS,  
571 not significant (*P*>0.05).

572 **Figure 6. Reduction of *GstS1* expression in *para*<sup>Shu</sup>.**

573 Levels of *GstS1* transcript, as evaluated by RNAseq analysis in control (*Canton-S*) and  
574 *para*<sup>Shu</sup> heterozygous females with or without a *GstS1*<sup>M26</sup> mutation (*para*<sup>Shu/+</sup> ; +/+ or

575 *para*<sup>Shu/+</sup> ; *GstS1*<sup>M26/+</sup>) (see Materials and Methods). Averages of four biological replicates are  
576 shown, as normalized read counts with SEM and adjusted *P*-values (*P*<sub>adj</sub>). \*\*\* *P*<sub>adj</sub><0.001.

577 **REFERENCES**

- 578 Agianian, B., P. A. Tucker, A. Schouten, K. Leonard, B. Bullard *et al.*, 2003 Structure of a *Drosophila*  
579 sigma class glutathione S-transferase reveals a novel active site topography suited for  
580 lipid peroxidation products. *J Mol Biol* 326: 151-165.
- 581 Allocati, N., M. Masulli, C. Di Ilio and L. Federici, 2018 Glutathione transferases: substrates,  
582 inhibitors and pro-drugs in cancer and neurodegenerative diseases. *Oncogenesis* 7: 8.
- 583 Bansal, V., 2017 A computational method for estimating the PCR duplication rate in DNA and  
584 RNA-seq experiments. *BMC Bioinformatics* 18: 43.
- 585 Benzer, S., 1967 Behavioral mutants of *Drosophila* isolated by countercurrent distribution. *Proc*  
586 *Natl Acad Sci U S A* 58: 1112-1119.
- 587 Besson, M., and J. R. Martin, 2005 Centrophobism/thigmotaxis, a new role for the mushroom  
588 bodies in *Drosophila*. *J Neurobiol* 62: 386-396.
- 589 Catterall, W. A., 2012 Voltage-gated sodium channels at 60: structure, function and  
590 pathophysiology. *J Physiol* 590: 2577-2589.
- 591 Catterall, W. A., F. Kalume and J. C. Oakley, 2010 NaV1.1 channels and epilepsy. *J Physiol*  
592 588: 1849-1859.
- 593 Chung, H., T. Sztal, S. Pasricha, M. Sridhar, P. Batterham *et al.*, 2009 Characterization of  
594 *Drosophila melanogaster* cytochrome P450 genes. *Proc Natl Acad Sci U S A* 106:  
595 5731-5736.

- 596 Claes, L., J. Del-Favero, B. Ceulemans, L. Lagae, C. Van Broeckhoven *et al.*, 2001 De novo  
597 mutations in the sodium-channel gene SCN1A cause severe myoclonic epilepsy of  
598 infancy. *Am J Hum Genet* 68: 1327-1332.
- 599 Cook, R. K., S. J. Christensen, J. A. Deal, R. A. Coburn, M. E. Deal *et al.*, 2012 The generation  
600 of chromosomal deletions to provide extensive coverage and subdivision of the  
601 *Drosophila melanogaster* genome. *Genome Biol* 13: R21.
- 602 Csala, M., T. Kardon, B. Legeza, B. Lizak, J. Mandl *et al.*, 2015 On the role of 4-  
603 hydroxynonenal in health and disease. *Biochim Biophys Acta* 1852: 826-838.
- 604 Davis, R. C., A. Diep, W. Hunziker, I. Klisak, T. Mohandas *et al.*, 1991 Assignment of human  
605 pancreatic lipase gene (PNLIP) to chromosome 10q24-q26. *Genomics* 11: 1164-1166.
- 606 Dib-Hajj, S. D., J. A. Black and S. G. Waxman, 2015 NaV1.9: a sodium channel linked to  
607 human pain. *Nature Reviews Neuroscience* 16: 511.
- 608 Ganetzky, B., and C. F. Wu, 1982 Indirect Suppression Involving Behavioral Mutants with  
609 Altered Nerve Excitability in *DROSOPHILA MELANOGASTER*. *Genetics* 100: 597-614.
- 610 Gilestro, G. F., and C. Cirelli, 2009 pySolo: a complete suite for sleep analysis in *Drosophila*.  
611 *Bioinformatics* 25: 1466-1467.
- 612 Hales, K. G., C. A. Korey, A. M. Larracuente and D. M. Roberts, 2015 *Genetics on the Fly: A*  
613 *Primer on the Drosophila Model System*. *Genetics* 201: 815-842.
- 614 Hannemann, F., A. Bichet, K. M. Ewen and R. Bernhardt, 2007 Cytochrome P450 systems--  
615 biological variations of electron transport chains. *Biochim Biophys Acta* 1770: 330-344.

- 616 Hayes, J. D., J. U. Flanagan and I. R. Jowsey, 2005 Glutathione transferases. *Annu Rev*  
617 *Pharmacol Toxicol* 45: 51-88.
- 618 Hodgkin, A. L., and A. F. Huxley, 1952 A quantitative description of membrane current and its  
619 application to conduction and excitation in nerve. *J Physiol* 117: 500-544.
- 620 Howlett, I. C., Z. M. Rusan, L. Parker and M. A. Tanouye, 2013 *Drosophila* as a model for  
621 intractable epilepsy: gilgamesh suppresses seizures in para(*bss1*) heterozygote flies.  
622 *G3 (Bethesda)* 3: 1399-1407.
- 623 Hu, Y., I. Flockhart, A. Vinayagam, C. Bergwitz, B. Berger *et al.*, 2011 An integrative approach  
624 to ortholog prediction for disease-focused and other functional studies. *BMC*  
625 *Bioinformatics* 12: 357.
- 626 Imai, Y., M. Soda and R. Takahashi, 2000 Parkin suppresses unfolded protein stress-induced  
627 cell death through its E3 ubiquitin-protein ligase activity. *J Biol Chem* 275: 35661-  
628 35664.
- 629 Isin, E. M., and F. P. Guengerich, 2007 Complex reactions catalyzed by cytochrome P450  
630 enzymes. *Biochim Biophys Acta* 1770: 314-329.
- 631 Jen, J. C., T. Ashizawa, R. C. Griggs and M. F. Waters, 2016 Rare neurological  
632 channelopathies — networks to study patients, pathogenesis and treatment. *Nature*  
633 *Reviews Neurology* 12: 195.
- 634 Joo, M., and R. T. Sadikot, 2012 PGD synthase and PGD2 in immune response. *Mediators*  
635 *Inflamm* 2012: 503128.

- 636 Kaas, G. A., J. Kasuya, P. Lansdon, A. Ueda, A. Iyengar *et al.*, 2016 Lithium-Responsive  
637 Seizure-Like Hyperexcitability Is Caused by a Mutation in the *Drosophila* Voltage-Gated  
638 Sodium Channel Gene *paralytic*. *eNeuro* 3.
- 639 Kasuya, J., A. Iyengar, H. L. Chen, P. Lansdon, C. F. Wu *et al.*, 2019 Milk-whey diet  
640 substantially suppresses seizure-like phenotypes of *para(Shu)*, a *Drosophila* voltage-  
641 gated sodium channel mutant. *J Neurogenet*: 1-15.
- 642 Klassen, T., C. Davis, A. Goldman, D. Burgess, T. Chen *et al.*, 2011 Exome sequencing of ion  
643 channel genes reveals complex profiles confounding personal risk assessment in  
644 epilepsy. *Cell* 145: 1036-1048.
- 645 Kroll, J. R., A. Saras and M. A. Tanouye, 2015 *Drosophila* sodium channel mutations:  
646 Contributions to seizure-susceptibility. *Exp Neurol*.
- 647 Lilly, M., R. Kreber, B. Ganetzky and J. R. Carlson, 1994 Evidence that the *Drosophila*  
648 olfactory mutant *smellblind* defines a novel class of sodium channel mutation. *Genetics*  
649 136: 1087-1096.
- 650 Lin, W. H., C. N. Giachello and R. A. Baines, 2017 Seizure control through genetic and  
651 pharmacological manipulation of *Pumilio* in *Drosophila*: a key component of neuronal  
652 homeostasis. *Dis Model Mech* 10: 141-150.
- 653 Lindsay, H. A., R. Baines, R. ffrench-Constant, K. Lilley, H. T. Jacobs *et al.*, 2008 The  
654 dominant cold-sensitive *Out-cold* mutants of *Drosophila melanogaster* have novel  
655 missense mutations in the voltage-gated sodium channel gene *paralytic*. *Genetics* 180:  
656 873-884.

- 657 Love, M. I., W. Huber and S. Anders, 2014 Moderated estimation of fold change and  
658 dispersion for RNA-seq data with DESeq2. *Genome Biol* 15: 550.
- 659 Martin, R. L., B. Pittendrigh, J. Liu, R. Reenan, R. ffrench-Constant *et al.*, 2000 Point mutations  
660 in domain III of a *Drosophila* neuronal Na channel confer resistance to allethrin. *Insect*  
661 *Biochem Mol Biol* 30: 1051-1059.
- 662 Parker, L., M. Padilla, Y. Du, K. Dong and M. A. Tanouye, 2011 *Drosophila* as a model for  
663 epilepsy: *bss* is a gain-of-function mutation in the para sodium channel gene that leads  
664 to seizures. *Genetics* 187: 523-534.
- 665 Rajakariar, R., M. Hilliard, T. Lawrence, S. Trivedi, P. Colville-Nash *et al.*, 2007 Hematopoietic  
666 prostaglandin D2 synthase controls the onset and resolution of acute inflammation  
667 through PGD2 and 15-deoxyDelta12 14 PGJ2. *Proc Natl Acad Sci U S A* 104: 20979-  
668 20984.
- 669 Rajakulendran, S., D. Kaski and M. G. Hanna, 2012 Neuronal P/Q-type calcium channel  
670 dysfunction in inherited disorders of the CNS. *Nature Reviews Neurology* 8: 86-96.
- 671 Regan, J. C., A. S. Brandao, A. B. Leitao, A. R. Mantas Dias, E. Sucena *et al.*, 2013 Steroid  
672 hormone signaling is essential to regulate innate immune cells and fight bacterial  
673 infection in *Drosophila*. *PLoS Pathog* 9: e1003720.
- 674 Roote, J., and S. Russell, 2012 Toward a complete *Drosophila* deficiency kit. *Genome Biol* 13:  
675 149.



- 676 Saisawang, C., J. Wongsantichon and A. J. Ketterman, 2012 A preliminary characterization of  
677 the cytosolic glutathione transferase proteome from *Drosophila melanogaster*. *Biochem*  
678 *J* 442: 181-190.
- 679 Sajjadian, S. M., S. Ahmed, M. A. Al Baki and Y. Kim, 2019 Prostaglandin D2 synthase and its  
680 functional association with immune and reproductive processes in a lepidopteran insect,  
681 *Spodoptera exigua*. *Gen Comp Endocrinol* 287: 113352.
- 682 Scarpati, M., Y. Qi, S. Govind and S. Singh, 2019 A combined computational strategy of  
683 sequence and structural analysis predicts the existence of a functional eicosanoid  
684 pathway in *Drosophila melanogaster*. *PLoS One* 14: e0211897.
- 685 Schutte, R. J., S. S. Schutte, J. Algara, E. V. Barragan, J. Gilligan *et al.*, 2014 Knock-in model  
686 of Dravet syndrome reveals a constitutive and conditional reduction in sodium current. *J*  
687 *Neurophysiol* 112: 903-912.
- 688 Shimura, H., N. Hattori, S. Kubo, Y. Mizuno, S. Asakawa *et al.*, 2000 Familial Parkinson  
689 disease gene product, parkin, is a ubiquitin-protein ligase. *Nat Genet* 25: 302-305.
- 690 Shoeb, M., N. H. Ansari, S. K. Srivastava and K. V. Ramana, 2014 4-Hydroxynonenal in the  
691 pathogenesis and progression of human diseases. *Curr Med Chem* 21: 230-237.
- 692 Singh, S. P., J. A. Coronella, H. Benes, B. J. Cochrane and P. Zimniak, 2001 Catalytic function  
693 of *Drosophila melanogaster* glutathione S-transferase DmGSTS1-1 (GST-2) in  
694 conjugation of lipid peroxidation end products. *Eur J Biochem* 268: 2912-2923.
- 695 Stofanko, M., S. Y. Kwon and P. Badenhorst, 2008 A misexpression screen to identify  
696 regulators of *Drosophila* larval hemocyte development. *Genetics* 180: 253-267.

- 697 Sun, L., J. Gilligan, C. Staber, R. J. Schutte, V. Nguyen *et al.*, 2012 A knock-in model of  
698 human epilepsy in *Drosophila* reveals a novel cellular mechanism associated with heat-  
699 induced seizure. *J Neurosci* 32: 14145-14155.
- 700 Suzuki, D. T., T. Grigliatti and R. Williamson, 1971 Temperature-sensitive mutations in  
701 *Drosophila melanogaster*. VII. A mutation (para-ts) causing reversible adult paralysis.  
702 *Proc Natl Acad Sci U S A* 68: 890-893.
- 703 Theken, K. N., Y. Deng, M. A. Kannon, T. M. Miller, S. M. Poloyac *et al.*, 2011 Activation of the  
704 acute inflammatory response alters cytochrome P450 expression and eicosanoid  
705 metabolism. *Drug Metab Dispos* 39: 22-29.
- 706 Tu, C. P., and B. Akgul, 2005 *Drosophila* glutathione S-transferases. *Methods Enzymol* 401:  
707 204-226.
- 708 Ugur, B., K. Chen and H. J. Bellen, 2016 *Drosophila* tools and assays for the study of human  
709 diseases. *Dis Model Mech* 9: 235-244.
- 710 Venetucci, L., M. Denegri, C. Napolitano and S. G. Priori, 2012 Inherited calcium  
711 channelopathies in the pathophysiology of arrhythmias. *Nature Reviews Cardiology* 9:  
712 561-575.
- 713 Waxman, S. G., and G. W. Zamponi, 2014 Regulating excitability of peripheral afferents:  
714 emerging ion channel targets. *Nature Neuroscience* 17: 153.
- 715 Whitworth, A. J., D. A. Theodore, J. C. Greene, H. Benes, P. D. Wes *et al.*, 2005 Increased  
716 glutathione S-transferase activity rescues dopaminergic neuron loss in a *Drosophila*  
717 model of Parkinson's disease. *Proc Natl Acad Sci U S A* 102: 8024-8029.

- 718 Williamson, R. L., 1982 Lithium stops hereditary shuddering in *Drosophila melanogaster*.  
719       Psychopharmacology (Berl) 76: 265-268.
- 720 Williamson, R. L. M., 1971 The isolation and study of two mutants affecting motor activity in  
721       *Drosophila melanogaster*, pp. in *Zoology*. University British Columbia, Vancouver.
- 722 Young, M. D., M. J. Wakefield, G. K. Smyth and A. Oshlack, 2010 Gene ontology analysis for  
723       RNA-seq: accounting for selection bias. *Genome Biol* 11: R14.
- 724 Zhang, H., and H. J. Forman, 2017 4-hydroxynonenal-mediated signaling and aging. *Free*  
725       *Radic Biol Med* 111: 219-225.
- 726 Zhang, H., J. Tan, E. Reynolds, D. Kuebler, S. Faulhaber *et al.*, 2002 The *Drosophila*  
727       slamdance gene: a mutation in an aminopeptidase can cause seizure, paralysis and  
728       neuronal failure. *Genetics* 162: 1283-1299.
- 729 Zhang, Y., J. Gao, K. K. Chung, H. Huang, V. L. Dawson *et al.*, 2000 Parkin functions as an  
730       E2-dependent ubiquitin- protein ligase and promotes the degradation of the synaptic  
731       vesicle-associated protein, CDCrel-1. *Proc Natl Acad Sci U S A* 97: 13354-13359.  
732

**Table 1. Effects of *GstS1*<sup>M26</sup> on viability and fertility of *para*<sup>Shu</sup> males**

| Genotype                                                                                          | Viability |              |                                       |                                         | Fertility |         |         |           |
|---------------------------------------------------------------------------------------------------|-----------|--------------|---------------------------------------|-----------------------------------------|-----------|---------|---------|-----------|
|                                                                                                   | Total     | <i>FM7/Y</i> | <i>para</i> <sup>Shu</sup> / <i>Y</i> | % <i>para</i> <sup>Shu</sup> / <i>Y</i> | Total     | Sterile | Fertile | % Fertile |
| <i>para</i> <sup>Shu</sup> / <i>Y</i> ; +/+                                                       | 73        | 67           | 6                                     | 8.2                                     | 43        | 42      | 1       | 2.3       |
| <i>para</i> <sup>Shu</sup> / <i>Y</i> ; <i>GstS1</i> <sup>M26</sup> /+                            | 121       | 83           | 38                                    | 31.4                                    | 45        | 28      | 17      | 37.8      |
| <i>para</i> <sup>Shu</sup> / <i>Y</i> ; <i>GstS1</i> <sup>M26</sup> / <i>GstS1</i> <sup>M26</sup> | 145       | 68           | 77                                    | 53.1                                    | 44        | 27      | 17      | 38.6      |

**Table 2. Effects of GST gene deletions on wing and thorax phenotypes of *para<sup>Shu/+</sup>***

| Chromosomal deficiency | Deleted segment | Deleted GST genes | Flies scored | Down-turned wings |                    | Indented thorax |                    |
|------------------------|-----------------|-------------------|--------------|-------------------|--------------------|-----------------|--------------------|
|                        |                 |                   |              | (%)               | ( <i>P</i> -value) | (%)             | ( <i>P</i> -value) |
| <i>Df(3R)Exel6164</i>  | 87B5-87B10      | <i>GstD1-D11</i>  | 72           | 95.8              | 0.154              | 62.5            | 0.001*             |
| <i>Df(2R)BSC335</i>    | 55C6-55F1       | <i>GstE1-E11</i>  | 59           | 91.5              | 0.741              | 86.4            | 0.550              |
| <i>Df(2R)BSC856</i>    | 60E1-60E4       | <i>GstE12</i>     | 68           | 77.9              | 0.208              | 83.8            | 0.397              |
| <i>Df(2R)BSC271</i>    | 44F12-45A12     | <i>GstE13</i>     | 67           | 94.0              | 0.480              | 77.6            | 0.0775             |
| <i>Df(2R)BSC273</i>    | 49F4-50A13      | <i>GstE14</i>     | 66           | 92.4              | 0.517              | 90.9            | 1                  |
| <i>Df(3L)BSC157</i>    | 66C12-66D6      | <i>GstO1-O4</i>   | 150          | 94.7              | 0.175              | 70.0            | 0.0052             |
| <i>Df(2R)BSC132</i>    | 45F6-46B4       | <i>GstT1-T2</i>   | 51           | 68.6              | 0.025              | 9.80            | <0.00001*          |
| <i>Df(1)Exel6254</i>   | 19C4-19D1       | <i>GstT3</i>      | 34           | 91.2              | 1                  | 94.2            | 0.691              |
| <i>Df(1)Exel6245</i>   | 11E11-11F4      | <i>GstT4</i>      | 26           | 23.1              | <0.00001*          | 80.8            | 0.277              |
| <i>Df(3R)by10</i>      | 85D8-85E13      | <i>GstZ1-Z2</i>   | 57           | 89.5              | 1                  | 91.2            | 1                  |
| <i>Df(2R)BSC433</i>    | 53F4-53F8       | <i>GstS1</i>      | 56           | 12.5              | <0.00001*          | 35.7            | <0.00001*          |
| No deficiency          | NA              | NA                | 44           | 88.6              | NA                 | 90.9            | NA                 |

Statistical significance in the severity of wing and thorax phenotypes between *para<sup>Shu</sup>* (*para<sup>Shu/+</sup>*) and *para<sup>Shu</sup>* with a deficiency (*para<sup>Shu/+</sup>* ; *Df/+* or *para<sup>Shu</sup>/Df*) was assessed using Fisher's exact test. The *P*-values were compared to Bonferroni adjusted type I error rate of 0.05/11 (=0.004545.....) for significance (\*). NA, not applicable.

**Table 3A. Enriched GO terms that are overrepresented in differentially expressed genes in *para<sup>Shu</sup>/+* compared with control**

| Gene ontology | Term                                                  | Ontology class | <i>P</i> <sub>adj</sub> over-represented value | # of genes |
|---------------|-------------------------------------------------------|----------------|------------------------------------------------|------------|
| GO:0008010    | structural constituent of chitin-based larval cuticle | MF             | 8.83E-3                                        | 8          |
| GO:0005214    | structural constituent of chitin-based cuticle        | MF             | 1.05E-2                                        | 8          |
| GO:0042302    | structural constituent of cuticle                     | MF             | 1.24E-2                                        | 8          |
| GO:0040003    | chitin-based cuticle development                      | BP             | 2.01E-2                                        | 9          |

MF: molecular function, BP: biological process.

**Table 3B. Differentially expressed genes in *para<sup>Shu</sup>/+* compared with control that are included in the enriched GO terms**

| Flybase ID  | Gene symbol    | Fold change (log2) | Fold change | <i>P</i> <sub>adj</sub> | Gene product           |
|-------------|----------------|--------------------|-------------|-------------------------|------------------------|
| FBgn0033603 | <i>Cpr47Ef</i> | 1.14               | 2.20        | 2.03E-11                | Cuticular protein 47Ef |
| FBgn0004782 | <i>Ccp84Ab</i> | 1.02               | 2.03        | 1.83E-10                | Ccp84Ab                |
| FBgn0004783 | <i>Ccp84Aa</i> | 0.92               | 1.89        | 9.93E-05                | Ccp84Aa                |
| FBgn0001112 | <i>Gld</i>     | 0.73               | 1.66        | 3.22E-03                | Glucose dehydrogenase  |
| FBgn0004780 | <i>Ccp84Ad</i> | 0.72               | 1.65        | 1.02E-02                | Ccp84Ad                |
| FBgn0035281 | <i>Cpr62Bc</i> | 0.64               | 1.56        | 3.59E-03                | Cuticular protein 62Bc |
| FBgn0036619 | <i>Cpr72Ec</i> | 0.64               | 1.55        | 3.97E-02                | Cuticular protein 72Ec |
| FBgn0036680 | <i>Cpr73D</i>  | 0.514              | 1.43        | 3.35E-02                | Cuticular protein 73D  |
| FBgn0052029 | <i>Cpr66D</i>  | -0.68              | 0.62        | 9.58E-03                | Cuticular protein 66D  |

**Table 4. Genes most differentially expressed in *para<sup>Shu/+</sup>* compared with control**

| Flybase ID  | Gene symbol      | Fold change (log2) | Fold change | $P_{adj}$ | Gene product                |
|-------------|------------------|--------------------|-------------|-----------|-----------------------------|
| FBgn0052581 | <i>CG32581</i>   | 3.78               | 13.75       | 5.26E-99  | uncharacterized protein     |
| FBgn0010549 | <i>l(2)03659</i> | 2.44               | 5.43        | 3.70E-40  | lethal (2) 03659            |
| FBgn0020906 | <i>Jon25Bi</i>   | 1.72               | 3.29        | 4.84E-18  | Jonah 25Bi                  |
| FBgn0052523 | <i>CG32523</i>   | 1.66               | 3.17        | 3.83E-19  | uncharacterized protein     |
| FBgn0004427 | <i>LysD</i>      | 1.47               | 2.77        | 2.68E-13  | Lysozyme D                  |
| FBgn0004426 | <i>LysC</i>      | 1.46               | 2.76        | 7.84E-14  | Lysozyme C                  |
| FBgn0015037 | <i>Cyp4p1</i>    | 1.35               | 2.55        | 6.95E-15  | Cytochrome P450-4p1         |
| FBgn0033065 | <i>Cyp6w1</i>    | 1.30               | 2.47        | 3.77E-15  | Cyp6w1                      |
| FBgn0032286 | <i>CG7300</i>    | 1.20               | 2.30        | 2.47E-08  | uncharacterized protein     |
| FBgn0031169 | <i>CG1494</i>    | 1.20               | 2.30        | 4.50E-08  | uncharacterized protein     |
| FBgn0033603 | <i>Cpr47Ef</i>   | 1.14               | 2.20        | 2.03E-11  | Cuticular protein 47Ef      |
| FBgn0039039 | <i>lmd</i>       | 1.11               | 2.16        | 5.21E-07  | lame duck                   |
| FBgn0033458 | <i>CG18446</i>   | 1.10               | 2.14        | 7.42E-08  | uncharacterized protein     |
| FBgn0051865 | <i>Ada1-1</i>    | 1.09               | 2.12        | 7.74E-08  | transcriptional Adaptor 1-1 |
| FBgn0036833 | <i>CG3819</i>    | 1.07               | 2.11        | 1.12E-17  | uncharacterized protein     |
| FBgn0004782 | <i>Ccp84Ab</i>   | 1.02               | 2.03        | 1.83E-10  | Ccp84Ab                     |

Listed are genes differentially expressed in *para<sup>Shu</sup>* compared with control (*Canton-S*) with Fold change > 2 and  $P_{adj}$  < 0.01.

**Table 5. Expression levels of GST genes in control and *para*<sup>Shu/+</sup>**

| GST genes     | Flybase ID  | average of normalized counts (DESeq2) |                            | Fold change (log2) | Fold change | <i>P</i> <sub>adj</sub> |
|---------------|-------------|---------------------------------------|----------------------------|--------------------|-------------|-------------------------|
|               |             | Control                               | <i>para</i> <sup>Shu</sup> |                    |             |                         |
| <i>GstS1</i>  | FBgn0063499 | 15562.21                              | 7782.01                    | -0.76              | 0.59        | <0.001***               |
| <i>GstD1</i>  | FBgn0063495 | 10428.37                              | 10078.77                   | -0.02              | 0.99        | 1.000                   |
| <i>GstD2</i>  | FBgn0010041 | 175.19                                | 54.34                      | -0.72              | 0.61        | 0.010*                  |
| <i>GstD3</i>  | FBgn0037696 | 315.48                                | 208.52                     | -0.20              | 0.87        | 1.000                   |
| <i>GstD4</i>  | FBgn0063492 | 6.43                                  | 5.55                       | -0.06              | 0.96        | 1.000                   |
| <i>GstD5</i>  | FBgn0063498 | 43.77                                 | 20.34                      | -0.32              | 0.80        | 0.878                   |
| <i>GstD6</i>  | FBgn0010043 | 2.45                                  | 4.40                       | 0.14               | 1.10        | 1.000                   |
| <i>GstD7</i>  | FBgn0050000 | 75.87                                 | 83.37                      | 0.07               | 1.05        | 1.000                   |
| <i>GstD8</i>  | FBgn0086348 | 50.70                                 | 55.24                      | 0.06               | 1.04        | 1.000                   |
| <i>GstD9</i>  | FBgn0010044 | 373.48                                | 431.20                     | 0.10               | 1.07        | 1.000                   |
| <i>GstD10</i> | FBgn0063497 | 126.21                                | 176.08                     | 0.30               | 1.23        | 1.000                   |
| <i>GstD11</i> | FBgn0037697 | 34.52                                 | 43.76                      | 0.18               | 1.13        | 1.000                   |
| <i>GstE1</i>  | FBgn0033381 | 934.78                                | 894.99                     | -0.05              | 0.97        | 1.000                   |
| <i>GstE2</i>  | FBgn0010226 | 63.43                                 | 77.50                      | 0.18               | 1.13        | 1.000                   |
| <i>GstE3</i>  | FBgn0010042 | 679.13                                | 697.94                     | 0.02               | 1.01        | 1.000                   |
| <i>GstE4</i>  | FBgn0033817 | 89.15                                 | 101.79                     | 0.14               | 1.10        | 1.000                   |
| <i>GstE5</i>  | FBgn0063491 | 203.55                                | 227.27                     | 0.10               | 1.07        | 1.000                   |
| <i>GstE6</i>  | FBgn0038029 | 2026.31                               | 1985.35                    | -0.02              | 0.99        | 1.000                   |
| <i>GstE7</i>  | FBgn0001149 | 561.78                                | 493.62                     | -0.09              | 0.94        | 1.000                   |
| <i>GstE8</i>  | FBgn0035906 | 410.02                                | 375.98                     | -0.06              | 0.96        | 1.000                   |
| <i>GstE9</i>  | FBgn0010039 | 887.16                                | 1218.13                    | 0.39               | 1.31        | 0.206                   |
| <i>GstE10</i> | FBgn0063493 | 90.21                                 | 111.71                     | 0.17               | 1.13        | 1.000                   |
| <i>GstE11</i> | FBgn0042206 | 287.81                                | 283.10                     | -0.02              | 0.99        | 1.000                   |
| <i>GstE12</i> | FBgn0030484 | 4456.11                               | 4955.73                    | 0.11               | 1.08        | 1.000                   |
| <i>GstE13</i> | FBgn0038020 | 922.06                                | 894.20                     | -0.02              | 0.99        | 1.000                   |
| <i>GstE14</i> | FBgn0035904 | 118.30                                | 136.79                     | 0.12               | 1.09        | 1.000                   |
| <i>GstO1</i>  | FBgn0035907 | 604.75                                | 547.12                     | -0.09              | 0.94        | 1.000                   |



|              |             |         |         |       |      |         |
|--------------|-------------|---------|---------|-------|------|---------|
| <i>GstO2</i> | FBgn0063494 | 1408.05 | 2117.33 | 0.52  | 1.43 | 0.002** |
| <i>GstO3</i> | FBgn0034354 | 816.42  | 835.42  | 0.03  | 1.02 | 1.000   |
| <i>GstO4</i> | FBgn0050005 | 171.63  | 192.39  | 0.13  | 1.09 | 1.000   |
| <i>GstT1</i> | FBgn0031117 | 1085.64 | 998.88  | -0.07 | 0.95 | 1.000   |
| <i>GstT2</i> | FBgn0034335 | 511.60  | 386.89  | -0.32 | 0.80 | 0.705   |
| <i>GstT3</i> | FBgn0063496 | 639.30  | 587.15  | -0.11 | 0.93 | 1.000   |
| <i>GstT4</i> | FBgn0010040 | 2218.35 | 2405.08 | 0.10  | 1.07 | 1.000   |
| <i>GstZ1</i> | FBgn0027590 | 306.76  | 252.35  | -0.24 | 0.85 | 1.000   |
| <i>GstZ2</i> | FBgn0010038 | 272.48  | 246.37  | -0.09 | 0.94 | 1.000   |

Transcript levels of the 36 genes encoding soluble GSTs were evaluated by DEseq2 analysis of four biological replicates in control (*Canton-S*) and *para<sup>Shu</sup>*. Adjusted P-values ( $P_{adj}$ ) were obtained using Benjamini-Hochberg (BH) procedure ( $*P_{adj} < 0.05$ ;  $**P_{adj} < 0.01$ ;  $***P_{adj} < 0.001$ ).

**Table 6A. Enriched GO terms that are overrepresented in differentially expressed genes in *para<sup>Shu/+</sup>; GstS1<sup>M26/+</sup>* compared with *para<sup>Shu/+</sup>; +/+***

| Gene ontology | Term                                                                                                  | Ontology class | $P_{adj}$ over-represented value | # of genes |
|---------------|-------------------------------------------------------------------------------------------------------|----------------|----------------------------------|------------|
| GO:0020037    | heme binding                                                                                          | MF             | 7.31E-4                          | 14         |
| GO:0046906    | tetrapyrrole binding                                                                                  | MF             | 7.31E-4                          | 14         |
| GO:0005506    | iron ion binding                                                                                      | MF             | 1.53E-3                          | 14         |
| GO:0016705    | oxidoreductase activity, acting on paired donors, with incorporation or reduction of molecular oxygen | MF             | 2.83E-3                          | 14         |
| GO:0048037    | cofactor binding                                                                                      | MF             | 4.60E-3                          | 21         |

MF: molecular function

**Table 6B. Differentially expressed genes in *para<sup>Shu/+</sup>; GstS1<sup>M26/+</sup>* compared with *para<sup>Shu/+</sup>; +/+* that are included in the enriched GO terms**

| Flybase ID  | Gene symbol       | Fold change (log2) | Fold change | $P_{adj}$ | Gene product                             |
|-------------|-------------------|--------------------|-------------|-----------|------------------------------------------|
| FBgn0013772 | <i>Cyp6a8</i> *   | 1.69               | 3.22        | 9.37E-20  | Cytochrome P450-6a8                      |
| FBgn0000473 | <i>Cyp6a2</i> *   | 1.51               | 2.84        | 6.10E-15  | Cytochrome P450-6a2                      |
| FBgn0041337 | <i>Cyp309a2</i> * | 1.11               | 2.16        | 1.07E-07  | Cyp309a2                                 |
| FBgn0033978 | <i>Cyp6a23</i> *  | 1.05               | 2.07        | 7.16E-15  | Cyp6a23                                  |
| FBgn0033980 | <i>Cyp6a20</i> *  | 0.80               | 1.74        | 4.29E-04  | Cyp6a20                                  |
| FBgn0033983 | <i>ADPS</i>       | 0.78               | 1.72        | 9.71E-08  | Alkyldihydroxyacetone-phosphate synthase |
| FBgn0015039 | <i>Cyp9b2</i> *   | 0.68               | 1.60        | 5.52E-07  | Cytochrome P450-9b2                      |
| FBgn0031689 | <i>Cyp28d1</i> *  | 0.66               | 1.58        | 8.28E-06  | Cyp28d1                                  |
| FBgn0015037 | <i>Cyp4p1</i> *   | 0.59               | 1.51        | 2.79E-04  | Cytochrome P450-4p1                      |
| FBgn0036381 | <i>CG8745</i>     | -0.37              | 0.78        | 4.09E-02  | uncharacterized protein                  |
| FBgn0003965 | <i>v</i>          | -0.38              | 0.77        | 4.06E-02  | vermilion                                |
| FBgn0035906 | <i>GstO2</i>      | -0.41              | 0.75        | 1.59E-02  | Glutathione S transferase O2             |

|             |                 |       |      |          |                                      |
|-------------|-----------------|-------|------|----------|--------------------------------------|
| FBgn0036927 | <i>Gabat</i>    | -0.49 | 0.71 | 1.13E-04 | gamma-aminobutyric acid transaminase |
| FBgn0000566 | <i>Eip55E</i>   | -0.54 | 0.69 | 1.27E-04 | Ecdysone-induced protein 55E         |
| FBgn0051674 | <i>CG31674</i>  | -0.55 | 0.68 | 8.18E-03 | uncharacterized protein              |
| FBgn0029172 | <i>Fad2</i>     | -0.79 | 0.58 | 1.60E-05 | Fad2                                 |
| FBgn0015040 | <i>Cyp9c1*</i>  | -0.79 | 0.58 | 7.31E-06 | Cytochrome P450-9c1                  |
| FBgn0034756 | <i>Cyp6d2*</i>  | -0.80 | 0.58 | 5.96E-09 | Cyp6d2                               |
| FBgn0001112 | <i>Gld</i>      | -0.95 | 0.52 | 1.43E-06 | Glucose dehydrogenase                |
| FBgn0031925 | <i>Cyp4d21*</i> | -0.95 | 0.52 | 8.28E-06 | Cyp4d21                              |
| FBgn0015714 | <i>Cyp6a17*</i> | -1.04 | 0.49 | 2.76E-15 | Cytochrome P450-6a17                 |
| FBgn0033395 | <i>Cyp4p2*</i>  | -2.68 | 0.16 | 3.51E-48 | Cyp4p2                               |

\* indicates genes that belong to GO:0020037, GO:0046906, GO:0005506 and GO:0016705.

**Table 7. Genes most differentially expressed in *para*<sup>Shu/+</sup> ; *GstS1*<sup>M26/+</sup> compared with *para*<sup>Shu/+</sup> ; +/+**

| Flybase ID  | Gene symbol       | Fold change (log2) | Fold change | <i>P</i> <sub>adj</sub> | Gene product                                         |
|-------------|-------------------|--------------------|-------------|-------------------------|------------------------------------------------------|
| FBgn0085732 | <i>CR40190</i>    | 2.12               | 4.36        | 1.32E-29                | pseudo                                               |
| FBgn0033954 | <i>CG12860</i>    | 2.02               | 4.05        | 1.42E-26                | uncharacterized protein                              |
| FBgn0039752 | <i>CG15530</i>    | 1.95               | 3.86        | 7.79E-30                | uncharacterized protein                              |
| FBgn0037850 | <i>CG14695</i>    | 1.90               | 3.73        | 1.32E-29                | uncharacterized protein                              |
| FBgn0033748 | <i>vis</i>        | 1.90               | 3.72        | 1.91E-23                | vismay                                               |
| FBgn0266084 | <i>Fhos</i>       | 1.85               | 3.60        | 6.52E-32                | Formin homology 2 domain containing                  |
| FBgn0040104 | <i>lectin-24A</i> | 1.76               | 3.38        | 5.28E-20                | lectin-24A                                           |
| FBgn0013772 | <i>Cyp6a8</i>     | 1.69               | 3.22        | 9.38E-20                | Cytochrome P450-6a8                                  |
| FBgn0031935 | <i>CG13793</i>    | 1.63               | 3.09        | 1.28E-22                | uncharacterized protein                              |
| FBgn0000473 | <i>Cyp6a2</i>     | 1.51               | 2.84        | 6.10E-15                | Cytochrome P450-6a2                                  |
| FBgn0033926 | <i>Arc1</i>       | 1.42               | 2.67        | 4.34E-25                | Activity-regulated cytoskeleton associated protein 1 |
| FBgn0085452 | <i>CG34423</i>    | 1.37               | 2.58        | 1.77E-12                | uncharacterized protein                              |
| FBgn0259896 | <i>NimC1</i>      | 1.35               | 2.54        | 1.51E-13                | Nimrod C1                                            |
| FBgn0261055 | <i>Sfp26Ad</i>    | 1.28               | 2.43        | 8.50E-11                | Seminal fluid protein 26Ad                           |
| FBgn0003082 | <i>phr</i>        | 1.27               | 2.41        | 1.06E-23                | photorepair                                          |
| FBgn0003961 | <i>Uro</i>        | 1.19               | 2.28        | 1.17E-14                | Urate oxidase                                        |
| FBgn0013308 | <i>Odc2</i>       | 1.16               | 2.23        | 1.61E-08                | Ornithine decarboxylase 2                            |
| FBgn0004426 | <i>LysC</i>       | 1.12               | 2.18        | 5.61E-08                | Lysozyme C                                           |
| FBgn0052198 | <i>CG32198</i>    | 1.12               | 2.17        | 3.25E-08                | uncharacterized protein                              |
| FBgn0041337 | <i>Cyp309a2</i>   | 1.11               | 2.16        | 1.07E-07                | Cyp309a2                                             |
| FBgn0053511 | <i>CG33511</i>    | 1.10               | 2.14        | 1.07E-07                | uncharacterized protein                              |
| FBgn0034783 | <i>CG9825</i>     | 1.09               | 2.12        | 1.95E-07                | uncharacterized protein                              |

|             |                 |       |      |          |                                             |
|-------------|-----------------|-------|------|----------|---------------------------------------------|
| FBgn0032210 | <i>CYLD</i>     | 1.05  | 2.07 | 7.58E-11 | Cylindromatosis                             |
| FBgn0033978 | <i>Cyp6a23</i>  | 1.05  | 2.07 | 7.16E-15 | Cyp6a23                                     |
| FBgn0004425 | <i>LysB</i>     | 1.03  | 2.04 | 1.13E-06 | Lysozyme B                                  |
| FBgn0004782 | <i>Ccp84Ab</i>  | -1.01 | 0.50 | 9.43E-07 | Ccp84Ab                                     |
| FBgn0034715 | <i>Oatp58Db</i> | -1.01 | 0.50 | 1.05E-11 | Organic anion transporting polypeptide 58Db |
| FBgn0037292 | <i>plh</i>      | -1.02 | 0.49 | 7.84E-12 | pasang lhamu                                |
| FBgn0015714 | <i>Cyp6a17</i>  | -1.04 | 0.49 | 2.76E-15 | Cytochrome P450-6a17                        |
| FBgn0030815 | <i>CG8945</i>   | -1.09 | 0.47 | 3.08E-08 | uncharacterized protein                     |
| FBgn0004783 | <i>Ccp84Aa</i>  | -1.10 | 0.47 | 1.11E-07 | Ccp84Aa                                     |
| FBgn0250825 | <i>CG34241</i>  | -1.21 | 0.43 | 3.92E-10 | uncharacterized protein                     |
| FBgn0034356 | <i>Pepck2</i>   | -1.29 | 0.41 | 8.57E-12 | Phosphoenolpyruvate carboxykinase 2         |
| FBgn0031533 | <i>CG2772</i>   | -1.45 | 0.37 | 4.15E-29 | uncharacterized protein                     |
| FBgn0031741 | <i>CG11034</i>  | -1.54 | 0.35 | 1.23E-18 | uncharacterized protein                     |
| FBgn0260874 | <i>Ir76a</i>    | -1.68 | 0.31 | 7.94E-19 | Ionotropic receptor 76a                     |
| FBgn0033395 | <i>CR40190</i>  | -2.68 | 0.16 | 3.51E-48 | Cyp4p2                                      |

Listed are genes differentially expressed in *para*<sup>Shu/+</sup> ; *GstS*<sup>1M26/+</sup> compared with *para*<sup>Shu/+</sup> ; +/+ with Fold change > 2 and  $P_{adj} < 0.01$ .

Figure 1

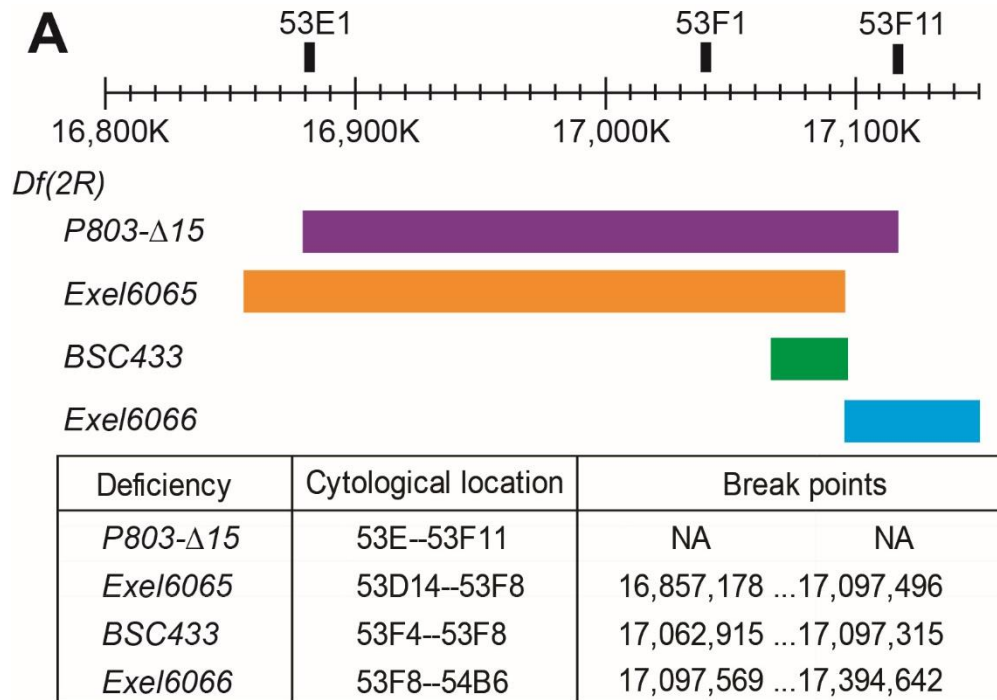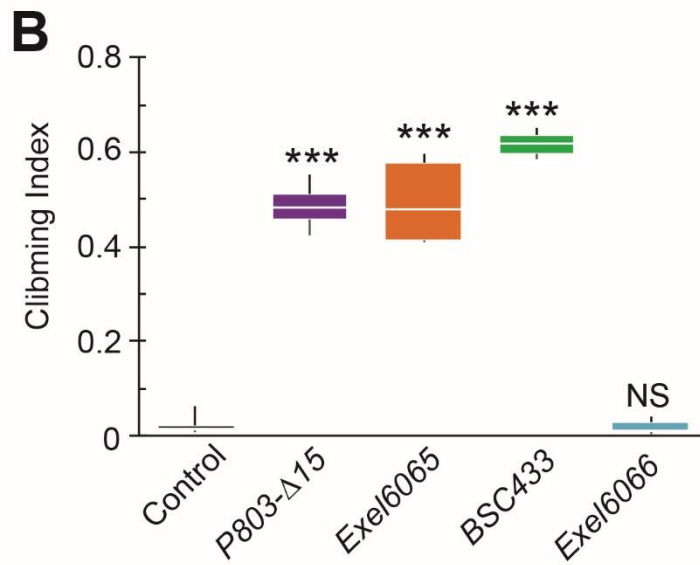

Figure 2

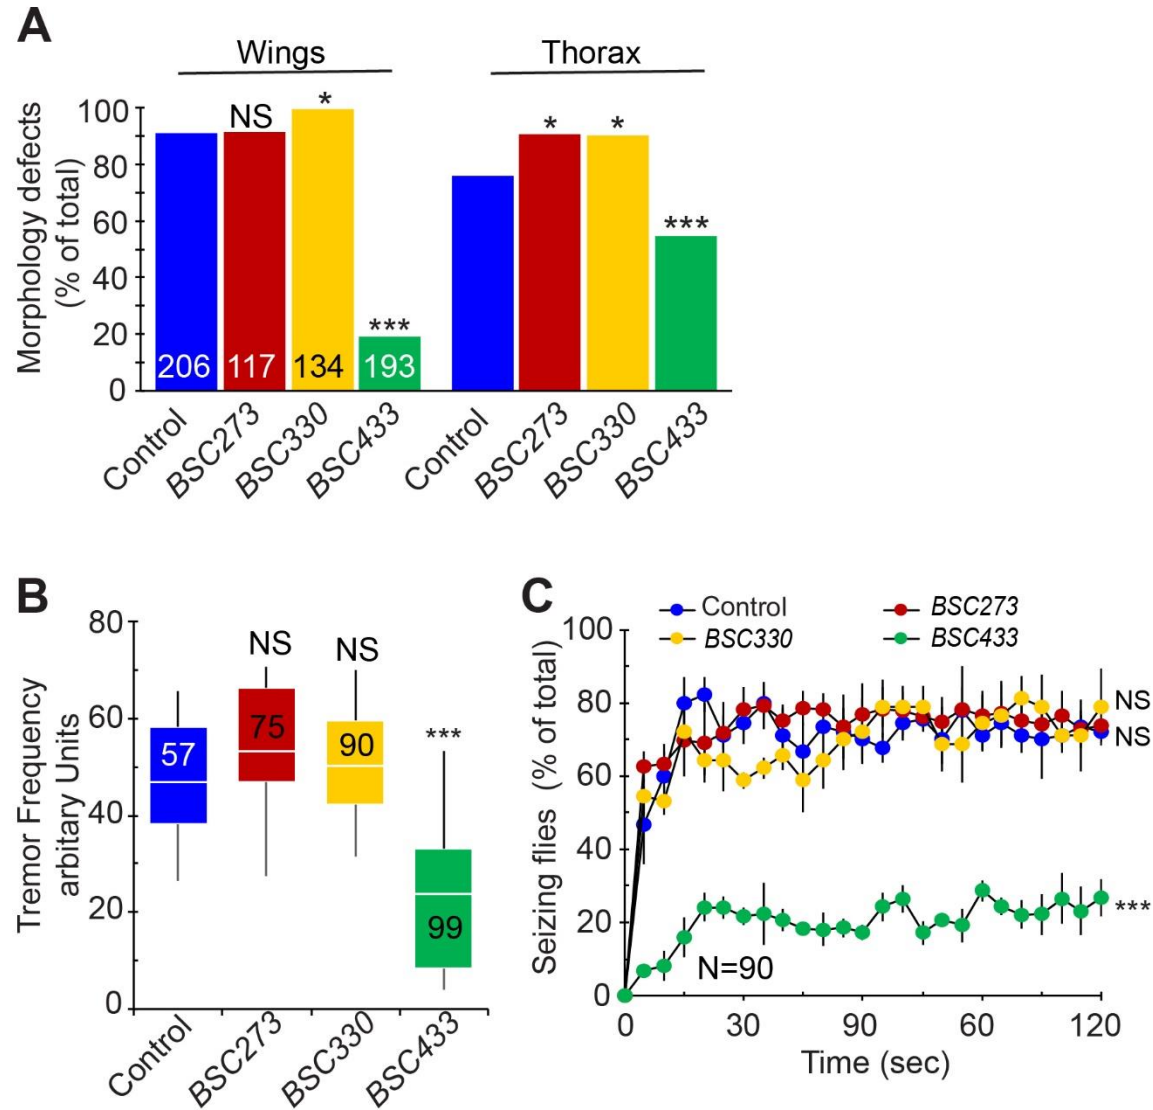

Figure 3

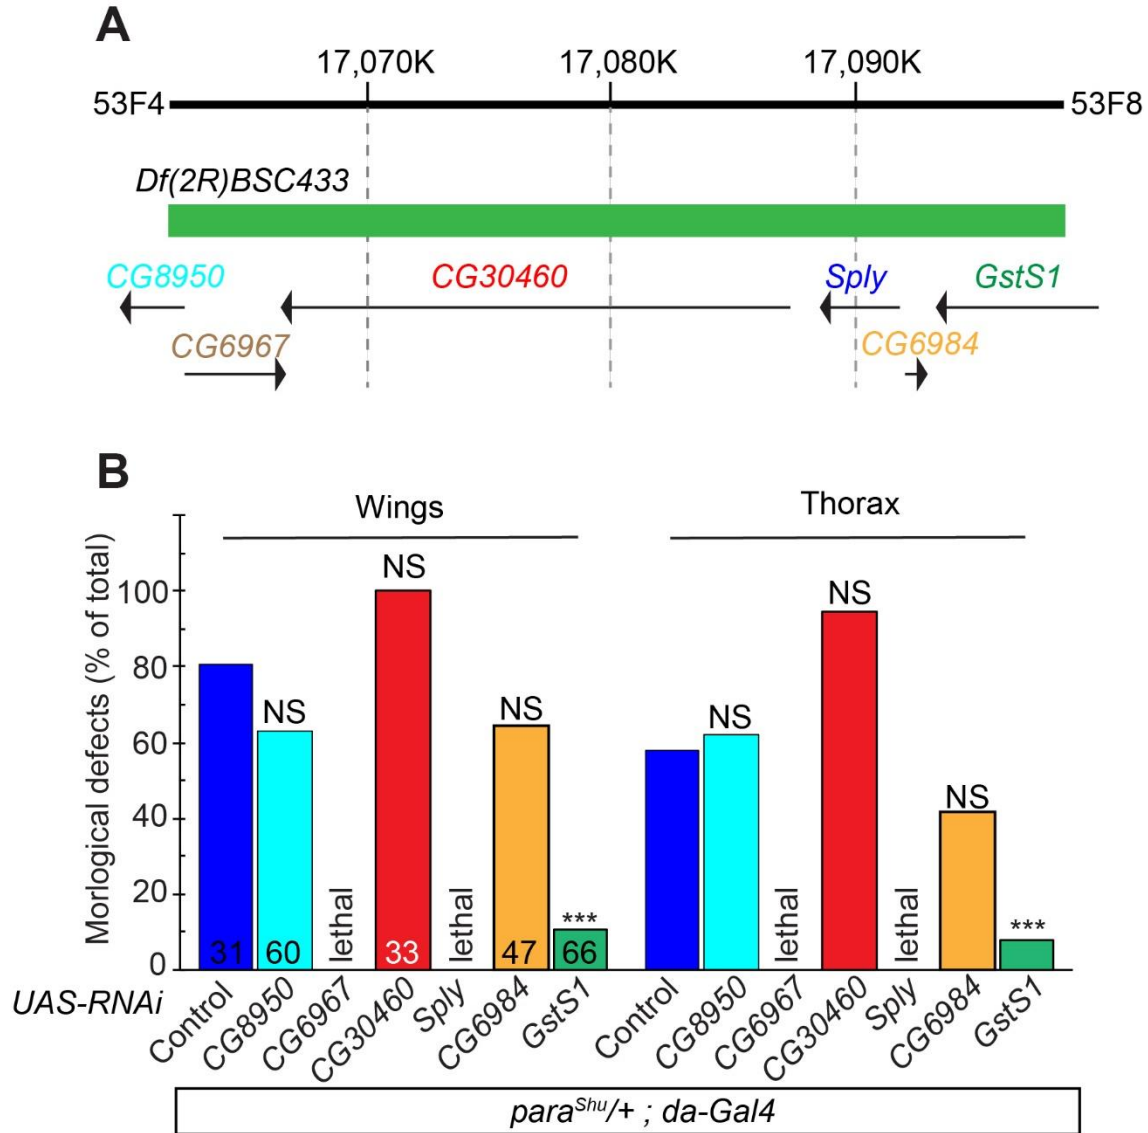



Figure 4

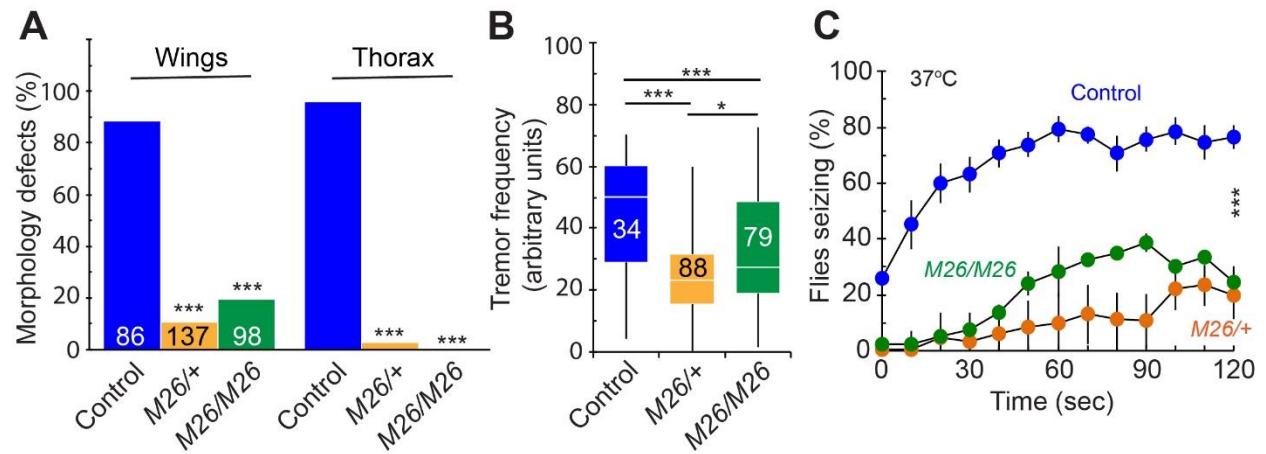

Figure 5

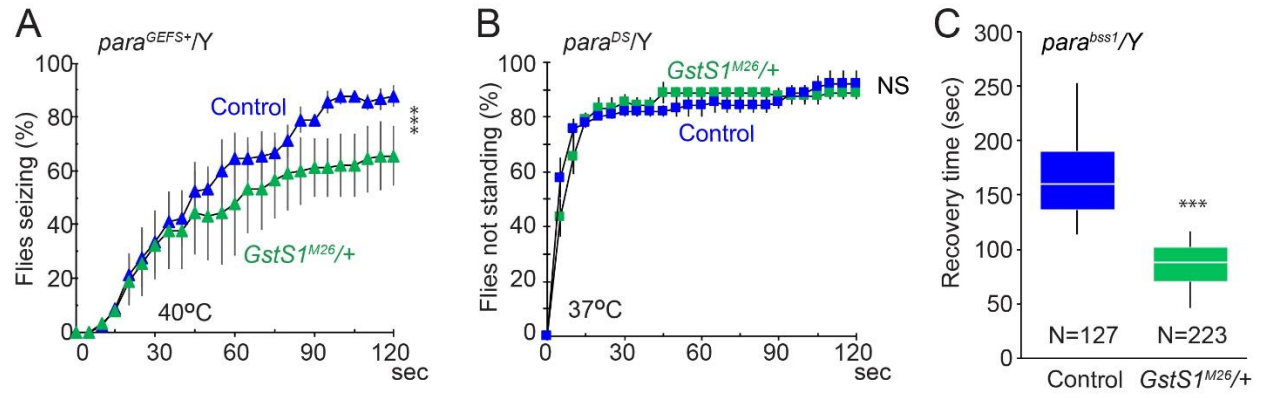

Figure 6

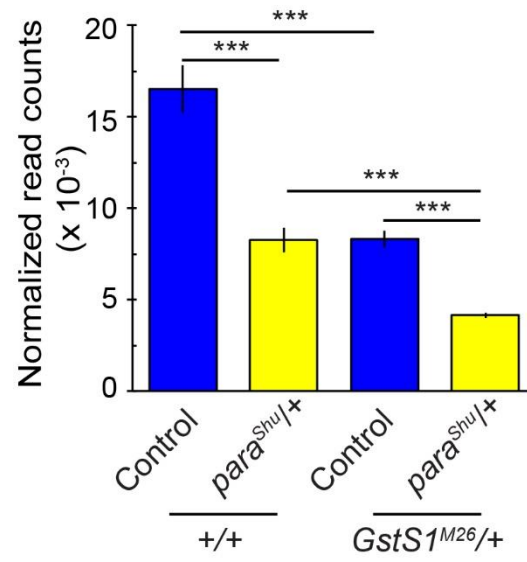

Source: http://biorxiv.org/content/10.1101/2020.01.21.906156v1.full.pdf
